# Supplementary material for: Systems Biology Analysis Reveals Eight SLC22 Transporter Subgroups, Including OATs, OCTs, and OCTNs
Source: Int J Mol Sci. 2020 Mar 5;21(5):1791. doi: 10.3390/ijms21051791 (PMC7084758; doi:10.3390/ijms21051791)
Supplement: Supplementary file 1 [file ijms-21-01791-s001.zip › ijms-730724-supplementary Table S1.xlsx]

## Sheet: All
GENE	METABOLITE	Source (GWAS, in vitro, in vivo)	Metrics	Citation
SLC22A1	ISOBUTYRYLCARNITINE	GWAS, rs1564348	p=1.37E-12	Shin et al., 2014
SLC22A1	PYRIDOXIC ACID	GWAS, rs2197296	p=2.37E-05	Shin et al., 2014
SLC22A1	CARNITINE	GWAS, rs622342	p=9.17E-09	Shin et al., 2014
SLC22A1	OCTANOYLCARNITINE	GWAS, rs662138	p=1.512E-14	Draisma et al., 2015
SLC22A1	MPP+	in vitro, HEK293	multiple assays	Grundemann et al., 1995
SLC22A1	EPINEPHRINE	in vitro, HEK293	Km: 1.10±0.30 mM	Amphoux et al., 2006
SLC22A1	SEROTONIN	in vitro, HEK293	p<0.05	Chen et al., 2014
SLC22A1	TETRAETHYLAMMONIUM	in vitro, HEK293	multiple assays	Grundemann et al., 1995
SLC22A1	THIAMINE	in vitro, HEK293; in vivo, Oct-/-mice	multiple assays	Chen et al., 2014
SLC22A1	PROSTAGLANDIN E2	in vitro, proximal tubule cells S2	Km: 657±53.1 nM	Kimura et al., 2002
SLC22A1	PROSTAGLANDIN F2	in vitro, proximal tubule cells S2	Km: 477±33.1 nM	Kimura et al., 2002
SLC22A1	CHOLINE	in vitro, rOCT1 Xenopus oocytes	Km: 346±50 uM	Sweet et al., 2001
SLC22A1	DOPAMINE	in vitro, rOCT1 Xenopus oocytes	Km: 19.4±2.9 uM	Busch et al., 1996
SLC22A1	NOREPINEPHRINE	in vitro, Xenopus oocytes	Ki: 6.2 mM	Busch et al., 1996
SLC22A1	QUININE	in vitro, Xenopus oocytes	Ki: 0.93±0.08 uM	Gorboulev et al., 1997
SLC22A2	N1-METHYLADENOSINE	GWAS, rs316003	p=1.97E-08	Shin et al., 2014
SLC22A2	3-DEHYDROCARNITINE	GWAS, rs316019	p=2.06E-08	Shin et al., 2014
SLC22A2	SUCCINYLCARNITINE	GWAS, rs3798156	p=7.15E-05	Shin et al., 2014
SLC22A2	TRYPTOPHAN	in vitro, defolliculated oocytes	IC50: 6.11 mM	Song et al., 2012
SLC22A2	URIDINE	in vitro, defolliculated oocytes	IC50: 51.5 mM	Song et al., 2012
SLC22A2	CREATININE	in vitro, HEK293	Km: 4.0 mM	Urakami et al., 2004
SLC22A2	DOPAMINE	in vitro, HEK293	Km: 1.40±0.20 mM	Amphoux et al., 2006
SLC22A2	EPINEPHRINE	in vitro, HEK293	Km: 0.42±0.10 mM	Amphoux et al., 2006
SLC22A2	HISTAMINE	in vitro, HEK293	Km: 0.94±0.15 mM	Amphoux et al., 2006
SLC22A2	MPP+	in vitro, HEK293	multiple assays	Grundemann et al., 1999
SLC22A2	NOREPINEPHRINE	in vitro, HEK293	Km: 1.50±0.10 mM	Amphoux et al., 2006
SLC22A2	SEROTONIN	in vitro, HEK293	Km: 0.29±0.06 mM	Amphoux et al., 2006
SLC22A2	TETRAETHYLAMMONIUM	in vitro, HEK293	multiple assays	Grundemann et al., 1995
SLC22A2	THIAMINE	in vitro, hepatocyes; in vivo, breast milk of Oct2-/- mice	28-fold thiamine decrease, p<0.05	Kato et al., 2015
SLC22A2	PROSTAGLANDIN E2	in vitro, proximal tubule cells S2	Km: 28.9±3.2 nM	Kimura et al., 2002
SLC22A2	PROSTAGLANDIN F2	in vitro, proximal tubule cells S2	Km: 334±24.1 nM	Kimura et al., 2002
SLC22A2	CHOLINE	in vitro, Xenopus oocytes	km: 102±80 uM	Sweet et al., 2001
SLC22A2	QUININE	in vitro, Xenopus oocytes	Ki: 3.4±0.8 uM	Gorboulev et al., 1997
SLC22A2	2-HYDROXY VALERIC ACID	in vivo, urinalysis of various genotypes	p=0.0005	Song et al., 2012
SLC22A2	3-HYDROXY-3-METHYLGLUTARIC ACID	in vivo, urinalysis of various genotypes	p=0.0005	Song et al., 2012
SLC22A2	OXOPROLINE	in vivo, urinalysis of various genotypes	p=0.0005	Song et al., 2012
SLC22A2	CITRULLINE	in vivo, urinalysis of various genotypes	p=0.0005	Song et al., 2012
SLC22A2	XANTHINE	in vivo, urinalysis of various genotypes	p=0.0005	Song et al., 2012
SLC22A2	XANTHOSINE	in vivo, urinalysis of various genotypes	p=0.0005	Song et al., 2012
SLC22A2	TRYPTOPHAN	in vivo, urinalysis of various genotypes	p=0.0005	Song et al., 2012
SLC22A3	CREATININE	GWAS, rs1397168	p=7.21E-05	Shin et al., 2014
SLC22A3	SUCCINYLCARNITINE	GWAS, rs3106166	p=2.58E-05	Shin et al., 2014
SLC22A3	7-METHYLGUANINE	GWAS, rs377551	p=4.97E-05	Shin et al., 2014
SLC22A3	EPINEPHRINE	in vitro, HEK293	Km: 0.24±0.05 mM	Amphoux et al., 2006
SLC22A3	HISTAMINE	in vitro, HEK293	Km: 0.22±0.06 mM	Amphoux et al., 2006
SLC22A3	NOREPINEPHRINE	in vitro, HEK293	Km: 2.63±0.08 mM	Amphoux et al., 2006
SLC22A3	DOPAMINE	in vitro, HRPE cells	inhibitory	Wu et al., 1998
SLC22A3	CHOLINE	in vitro, HRPE cells	45% of control	Wu et al., 1998
SLC22A3	MPP+	in vitro, HRPE cells	IC50 138 ± 11 μM	Wu et al., 1998
SLC22A3	TETRAETHYLAMMONIUM	in vitro, HRPE cells	23% of control	Wu et al., 1998
SLC22A3	SEROTONIN	in vitro, HRPE cells	inhibitory	Wu et al., 1998
SLC22A3	CARNITINE	in vitro, Koepsell et al., unpublished data	IC50: 5,590 uM	Koepsell et al., 2007
SLC22A4	2-METHYLBUTYROYLCARNITINE	GWAS, rs272884	p=1.01E-06	Shin et al., 2014
SLC22A4	2-TETRADECENOYLCARNITINE	GWAS, rs272884	p=3.48E-09	Shin et al., 2014
SLC22A4	3-DEHYDROCARNITINE	GWAS, rs272884	p=2.25E-25	Shin et al., 2014
SLC22A4	ACETYLCARNITINE	GWAS, rs272884	p=3.59E-11	Shin et al., 2014
SLC22A4	BUTYRYLCARNITINE	GWAS, rs272884	p=3.83E-08	Shin et al., 2014
SLC22A4	CARNITINE	GWAS, rs272884	p=6.57E-15	Shin et al., 2014
SLC22A4	CIS-4-DECENOYLCARNITINE	GWAS, rs272884	p=4.61E-05	Shin et al., 2014
SLC22A4	DECANOYLCARNITINE	GWAS, rs272884	p=2.91E-05	Shin et al., 2014
SLC22A4	GLUTAROYLCARNITINE	GWAS, rs272884	p=1.36E-05	Shin et al., 2014
SLC22A4	HEXANOYLCARNITINE	GWAS, rs272884	p=2.30E-10	Shin et al., 2014
SLC22A4	HOMOSTACHYDRINE	GWAS, rs272884	p=8.86E-10	Shin et al., 2014
SLC22A4	HYDROXYISOVALEROYLCARNITINE	GWAS, rs272884	p=5.27E-08	Shin et al., 2014
SLC22A4	ISOBUTYRYLCARNITINE	GWAS, rs272884	p=9.03E-05	Shin et al., 2014
SLC22A4	ISOVALERYLCARNITINE	GWAS, rs272884	p=1.11E-30	Shin et al., 2014
SLC22A4	LAURYLCARNITINE	GWAS, rs272884	p=1.13E-05	Shin et al., 2014
SLC22A4	OCTANOYLCARNITINE	GWAS, rs272884	p=1.88E-05	Shin et al., 2014
SLC22A4	OLEOYLCARNITINE	GWAS, rs272884	p=1.35E-10	Shin et al., 2014
SLC22A4	PALMITOYLCARNITINE	GWAS, rs272884	p=1.65E-09	Shin et al., 2014
SLC22A4	PROPIONYLCARNITINE	GWAS, rs272884	p=2.44E-11	Shin et al., 2014
SLC22A4	STEAROYLCARNITINE	GWAS, rs272884	p=1.11E-10	Shin et al., 2014
SLC22A4	ACYLCARNITINE	GWAS, rs273914	p=9.25E-23	Draisma et al., 2015
SLC22A4	ESTRONE SULFATE	GWAS, rs3792884	p=3.62E-05	Shin et al., 2014
SLC22A4	TRYPTOPHAN BETAINE	GWAS, rs3792884	p=4.85E-11	Shin et al., 2014
SLC22A4	CARNITINE	in vitro, HEK293	significant uptake, p<0.05	Yabuuchi et al., 1999
SLC22A4	TETRAETHYLAMMONIUM	in vitro, HEK293	Km: 0.436±0.041 mM	Tamai et al., 1997
SLC22A4	ERGOTHIONEINE	in vitro, HEK293	transport efficiency: 195 ul/min/mg of protein	Grundemann et al., 2005
SLC22A5	HOMOSTACHYDRINE	GWAS, rs17622208	p=8.01E-10	Shin et al., 2014
SLC22A5	ISOVALERYLCARNITINE	GWAS, rs17622208	p=5.11E-40	Shin et al., 2014
SLC22A5	PROPIONYLCARNITINE	GWAS, rs17622208	p=8.13E-14	Shin et al., 2014
SLC22A5	2-METHYLBUTYROYLCARNITINE	GWAS, rs274557	p=3.42E-06	Shin et al., 2014
SLC22A5	2-TETRADECENOYLCARNITINE	GWAS, rs274557	p=2.32E-09	Shin et al., 2014
SLC22A5	3-DEHYDROCARNITINE	GWAS, rs274557	p=6.83E-24	Shin et al., 2014
SLC22A5	ACETYLCARNITINE	GWAS, rs274557	p=1.44E-10	Shin et al., 2014
SLC22A5	BUTYRYLCARNITINE	GWAS, rs274557	p=5.28E-08	Shin et al., 2014
SLC22A5	CARNITINE	GWAS, rs274557	p=2.19E-14	Shin et al., 2014
SLC22A5	CIS-4-DECENOYLCARNITINE	GWAS, rs274557	p=9.95E-05	Shin et al., 2014
SLC22A5	DECANOYLCARNITINE	GWAS, rs274557	p=2.33E-05	Shin et al., 2014
SLC22A5	GLUTAROYLCARNITINE	GWAS, rs274557	p=9.15E-05	Shin et al., 2014
SLC22A5	HEXANOYLCARNITINE	GWAS, rs274557	p=1.37E-09	Shin et al., 2014
SLC22A5	HYDROXYISOVALEROYLCARNITINE	GWAS, rs274557	p=2.69E-07	Shin et al., 2014
SLC22A5	LAURYLCARNITINE	GWAS, rs274557	p=1.68E-06	Shin et al., 2014
SLC22A5	OCTANOYLCARNITINE	GWAS, rs274557	p=1.71E-05	Shin et al., 2014
SLC22A5	OLEOYLCARNITINE	GWAS, rs274557	p=2.53E-10	Shin et al., 2014
SLC22A5	PALMITOYLCARNITINE	GWAS, rs274557	p=7.63E-10	Shin et al., 2014
SLC22A5	STEAROYLCARNITINE	GWAS, rs274557	p=5.95E-10	Shin et al., 2014
SLC22A5	TRYPTOPHAN BETAINE	GWAS, rs274557	p=2.81E-05	Shin et al., 2014
SLC22A5	ACETYLCARNITINE	in vitro, HEK293	Km: 8.5 uM	Ohashi et al., 1999
SLC22A5	CARNITINE	in vitro, HEK293	Km: 4.3 uM	Ohashi et al., 1999
SLC22A6	4-METHYL-2-OXOPENTANOATE	GWAS, rs11568621	p=3.21E-05	Shin et al., 2014
SLC22A6	2-OXO-3-METHYLVALERATE	GWAS, rs11568629	p=6.54E-05	Shin et al., 2014
SLC22A6	4-BROMOBUTYRIC ACID	in vitro, CHO	IC50: 45.3 uM	Wu et al., 2016
SLC22A6	6-BROMOHEXANOIC ACID	in vitro, CHO	IC50: 1012 uM	Wu et al., 2016
SLC22A6	AMINOHIPPURIC ACID	in vitro, CHO	Km: 15.4 uM	Ho et al., 2000
SLC22A6	AMYL HEXANOATE	in vitro, CHO	IC50: 444 uM	Wu et al., 2016
SLC22A6	GLUTARATE	in vitro, CHO	Km: 10.7±1.6 uM	Cihlar et al., 1999
SLC22A6	HEXYL ACETATE	in vitro, CHO	IC50: 998 uM	Wu et al., 2016
SLC22A6	PYRIDOXIC ACID	in vitro, HEK293	Km: 33.0±5.3 uM	Shen et al., 2018
SLC22A6	URIC ACID	in vitro, HEK293	Km: 197.6±67.6 uM	Sato et al., 2008
SLC22A6	CITRULLINE	in vitro, HEK293 Flp-In	Km: 238 uM	Nakakariya et al., 2009
SLC22A6	PROSTAGLANDIN E2	in vitro, proximal tubule cells S2	Km: 970±48.3 nM	Kimura et al., 2002
SLC22A6	PROSTAGLANDIN F2	in vitro, proximal tubule cells S2	Km: 575±43.2 nM	Kimura et al., 2002
SLC22A6	2-ETHYLHEXANOATE	in vitro, Xenopus oocytes	IC50: 57±21 uM	Kaler et al., 2006
SLC22A6	ALPHA-KETOGLUTARATE	in vitro, Xenopus oocytes	exchange for PAH	Lopez-Nieto et al., 1997
SLC22A6	BUYTRATE	in vitro, Xenopus oocytes	Ki: 3500 uM	Kaler et al., 2007
SLC22A6	HEPTANOATE	in vitro, Xenopus oocytes	IC50: 57±21 uM	Kaler et al., 2006
SLC22A6	OCTANOATE	in vitro, Xenopus oocytes	Ki: 5.41 uM	Kaler et al., 2007
SLC22A6	PROPIONATE	in vitro, Xenopus oocytes	IC50: 8180 uM	Kaler et al., 2006
SLC22A6	CREATININE	in vivo, glomerular creatinine filtration	up, p<0.05	Vallon et al., 2012
SLC22A6	2-HYDROXY-3-METHYLVALERATE	in vivo, KO plasma	up, p=0.032	Eraly et al., 2006
SLC22A6	3-HYDROXYBUTYRATE	in vivo, KO plasma	up, p=0.007	Eraly et al., 2006
SLC22A6	3-HYDROXYISOBUTYRATE	in vivo, KO plasma	up, p=0.002	Eraly et al., 2006
SLC22A6	3-HYDROXYPROPIONATE	in vivo, KO plasma	up, p=0.032	Eraly et al., 2006
SLC22A6	BENZOATE	in vivo, KO plasma	up. p=0.024	Eraly et al., 2006
SLC22A6	INDOLELACTATE	in vivo, KO plasma	up, p=1.7E-2	Wikoff et al., 2011
SLC22A6	INDOXYL SULFATE	in vivo, KO plasma	up, p=8.1E-3	Wikoff et al., 2011
SLC22A6	KYNURENINE	in vivo, KO plasma	up, p=3.7E-2	Wikoff et al., 2011
SLC22A6	METHIONINE	in vivo, KO plasma	up, p=1.5E-2	Wikoff et al., 2011
SLC22A6	PANTOTHENIC ACID	in vivo, KO plasma	up, p=1.7E-4	Wikoff et al., 2011
SLC22A6	PHENOL SULFATE	in vivo, KO plasma	up, p=1.3E-3	Wikoff et al., 2011
SLC22A6	PHENYLACETYLGLYCINE	in vivo, KO plasma	up, p=1.1E-2	Wikoff et al., 2011
SLC22A6	P-HYDROXYPHENYLLACTIC ACID	in vivo, KO plasma	up, p=6.4E-4	Wikoff et al., 2011
SLC22A6	PYRIDOXIC ACID	in vivo, KO plasma	up, p=1.5E-4	Wikoff et al., 2011
SLC22A6	4-HYDROXYPHENYLLACTATE	in vivo, KO plasma/urine	up, p=0.009/down, p=0.000	Eraly et al., 2006
SLC22A6	N-ACETYLASPARTATE	in vivo, KO plasma/urine	up. p=0.040/down, p=0.006	Eraly et al., 2006
SLC22A6	2-HYDROXYISOVALERATE	in vivo, KO urine	down, p=0.001	Eraly et al., 2006
SLC22A6	2-OXO-3-METHYLVALERATE	in vivo, KO urine	down, p=0.014	Eraly et al., 2006
SLC22A6	3-HYDROXYVALERATE	in vivo, KO urine	down, p=0.026	Eraly et al., 2006
SLC22A6	3-METHYLCROTONYLGLYCINE	in vivo, KO urine	down, p=0.012	Eraly et al., 2006
SLC22A6	4-HYDROXYPHENYLACETATE	in vivo, KO urine	down, p=0.000	Eraly et al., 2006
SLC22A6	4-HYDROXYPHENYLPYRUVATE	in vivo, KO urine	down, p=0.018	Eraly et al., 2006
SLC22A6	5-METHYLCYTIDINE	in vivo, KO urine	down, p=8.08E-4	Wikoff et al., 2011
SLC22A6	HEXANOYLGLYCINE	in vivo, KO urine	down, p=0.002	Eraly et al., 2006
SLC22A6	N-ACETYLGLYCINE	in vivo, KO urine	down, p=6.11E-3	Wikoff et al., 2011
SLC22A6	N-METHYLADENOSINE	in vivo, KO urine	down, p=3.13E-2	Wikoff et al., 2011
SLC22A6	N2,N2-DIMETHYLGUANOSINE	in vivo, KO urine	down, p=5.58E-6	Wikoff et al., 2011
SLC22A6	OROTATE	in vivo, KO urine	down, p=0.000	Eraly et al., 2006
SLC22A6	P-CRESOL SULFATE	in vivo, KO urine	down, p=1.54E-4	Wikoff et al., 2011
SLC22A6	PROPIONYLGLYCINE	in vivo, KO urine	down, p=0.004	Eraly et al., 2006
SLC22A6	THYMIDINE	in vivo, KO urine	down, p=5.10E-4	Wikoff et al., 2011
SLC22A6	URACIL	in vivo, KO urine	down, p=0.002	Eraly et al., 2006
SLC22A6	URIC ACID	in vivo, KO urine	down, p=6.74E-5	Wikoff et al., 2011
SLC22A6	XANTHURENIC ACID	in vivo, KO urine	down, p=6.74E-5	Wikoff et al., 2011
SLC22A7	CARNITINE	GWAS, rs1574430	p=1.56E-07	Shin et al., 2014
SLC22A7	URIC ACID	GWAS, rs4149178	p=1.20E-06	Kottgen et al., 2012
SLC22A7	ALPHA-KETOGLUTARATE	in vitro, EcR293	significant uptake compared to control	Sun et al., 2001
SLC22A7	AMINOHIPPURIC ACID	in vitro, EcR293	significant uptake compared to control	Sun et al., 2001
SLC22A7	CAMP	in vitro, EcR293	significant uptake compared to control	Sun et al., 2001
SLC22A7	2′-DEOXYGUANOSINE	in vitro, HEK293	clearance: 20±2 uL/min/mg of protein	Fork et al., 2011
SLC22A7	CGMP	in vitro, HEK293	Km: 88±11 uM	Cropp et al., 2009
SLC22A7	CREATININE	in vitro, HEK293	Km: 795±138 uM	Shen et al., 2015
SLC22A7	GLUTAMATE	in vitro, HEK293	clearance: 70±5 uL/min/mg of protein	Fork et al., 2011
SLC22A7	OROTATE	in vitro, HEK293	clearance: 46±1 uL/min/mg of protein	Fork et al., 2011
SLC22A7	TRIGONELLINE	in vitro, HEK293	clearance: 121±5 uL/min/mg of protein	Fork et al., 2011
SLC22A7	PROSTAGLANDIN E2	in vitro, proximal tubule cells S2	Km: 713±68.2 uM	Kimura et al., 2002
SLC22A7	PROSTAGLANDIN F2	in vitro, proximal tubule cells S2	Km: 425±53.0 nM	Enomoto et al., 2004
SLC22A7	ASCORBIC ACID	in vitro, Xenopus oocytes	Km: 1.41±0.10 uM	Kobayashi et al., 2005
SLC22A7	DEHYDROEPIANDROSTERONE SULFATE	in vitro, Xenopus oocytes	Km: 4.22±0.32 uM	Kobayashi et al., 2005
SLC22A7	GLUTARATE	in vitro, Xenopus oocytes	Km: 0.43±0.05 uM	Kobayashi et al., 2005
SLC22A8	3-DEHYDROCARNITINE	GWAS, rs10792367	p=8.16E-05	Shin et al., 2014
SLC22A8	GENISTEIN-7-O-GLUCURONIDE	in vitro hOAT3, HEK293	km 7.94±1.42 uM	Wong et al., 2011b
SLC22A8	GLYCITEIN-7-O-GLUCURONIDE	in vitro hOAT3, HEK293	km 17.6±3.9 uM	Wong et al., 2011b
SLC22A8	QUERCETIN-3′-O-GLUCURONIDE	in vitro hOAT3, HEK293	km 5.25±0.86 uM	Wong et al., 2011b
SLC22A8	INDOXYL SULFATE	in vitro rOAT3, LLC-PK1	km 174±24 uM	Deguchi et al., 2004
SLC22A8	3-CARBOXY-4-METHYL-5-PROPYL-2-FURANPROPIONATE	in vitro rOAT3, LLC-PK2	km 10.9±2 uM	Deguchi et al., 2004
SLC22A8	ESTRONE SULFATE	in vitro, COS7-OAT3	km 2.18 uM	Duan et al., 2009
SLC22A8	GLYCOCHOLIC ACID	in vitro, HEK293	Km: 350±11 uM	Chen et al., 2008
SLC22A8	PYRIDOXIC ACID	in vitro, HEK293	Km: 52.1±15.3 uM	Shen et al., 2018
SLC22A8	URIC ACID	in vitro, HEK293	Km: 380.3±106.2 uM	Sato et al., 2008
SLC22A8	CHENODEOXYCHOLATE	in vitro, hOAT3 HEK293	137±33 uM	Chen et al., 2008
SLC22A8	CHOLIC ACID	in vitro, hOAT3 HEK293	554±86 uM	Chen et al., 2008
SLC22A8	DEOXYCHOLIC ACID	in vitro, hOAT3 HEK293	188±20 uM	Chen et al., 2008
SLC22A8	GLYCHOCHENODEOXYCHOLIC ACID	in vitro, hOAT3 HEK293	54.1±3.7 uM	Chen et al., 2008
SLC22A8	TAUROCHENODEOXYCHOLIC ACID	in vitro, hOAT3 HEK293	77.0±8.3 uM	Chen et al., 2008
SLC22A8	AMINOHIPPURIC ACID	in vitro, Lymphocytes	Km: 87.2 uM	Cha et al., 2001
SLC22A8	BISPHOSPHONATE	in vitro, Lymphocytes	inhibits estrone sulfate transport, p<0.01	Cha et al., 2001
SLC22A8	CHOLIC ACID	in vitro, Lymphocytes	inhibits estrone sulfate transport, p<0.001	Cha et al., 2001
SLC22A8	DEHYDROEPIANDROSTERONE SULFATE	in vitro, Lymphocytes	inhibits estrone sulfate transport, p<0.001	Cha et al., 2001
SLC22A8	GLUTARATE	in vitro, Lymphocytes	inhibits estrone sulfate transport, p<0.01	Cha et al., 2001
SLC22A8	SALICYLATE	in vitro, Lymphocytes	inhibits estrone sulfate transport, p<0.01	Cha et al., 2001
SLC22A8	TAUROCHOLIC ACID	in vitro, Lymphocytes	inhibits estrone sulfate transport, p<0.01	Cha et al., 2001
SLC22A8	TETRAETHYLAMMONIUM	in vitro, Lymphocytes	inhibits estrone sulfate transport, p<0.05	Cha et al., 2001
SLC22A8	FLAVIN MONONUCLEOTIDE	in vitro, OAT3 oocyte	IC50 using estrone sulfate 142±15 uM	Vallon et al., 2008
SLC22A8	THYMIDINE	in vitro, OAT3 oocyte	IC50 using estrone sulfate 384±25 uM	Vallon et al., 2008
SLC22A8	CREATININE	in vitro, OAT3 oocytes	p < 0.0001	Vallon et al., 2012
SLC22A8	PROSTAGLANDIN E2	in vitro, proximal tubule cells S2	Km: 345±42.1 nM	Kimura et al., 2002
SLC22A8	PROSTAGLANDIN F2	in vitro, proximal tubule cells S2	Km: 575±43.2 nM	Kimura et al., 2002
SLC22A8	HOMOVANILLIC ACID	in vitro, rOat3, Xl oocyes	Km 274 ± 100 μmol/L	Mori et al., 2003
SLC22A8	CREATININE	in vivo, glomerular creatinine filtration	up, p<0.05	Vallon et al., 2012
SLC22A8	1-METHYLIMIDAZOLEACETATE	in vivo, KO plasma up	p = 0.0188	Bush et al., 2017
SLC22A8	2-AMINO-3-HYDROXY-5-NITROBENZOPHENONE GLUCURONIDE	in vivo, KO plasma up	p = 0.0081	Wu et al., 2013
SLC22A8	2-AMINOPHENOL SULFATE	in vivo, KO plasma up	p = 0.0082	Bush et al., 2017
SLC22A8	2-HYDROXYDECANOATE	in vivo, KO plasma up	p = 0.0143	Bush et al., 2017
SLC22A8	2-OXINDOLE-3-ACETATE	in vivo, KO plasma up	p = 0.0028	Bush et al., 2017
SLC22A8	2-OXO-9-METHYLTHIONONANOIC ACID	in vivo, KO plasma up	p = 0.0102	Wu et al., 2013
SLC22A8	3-HYDROXYHEXANOATE	in vivo, KO plasma up	p = 0.0127	Bush et al., 2017
SLC22A8	3-HYDROXYPROMAZINE GLUCURONIDE	in vivo, KO plasma up	p = 0.0211	Wu et al., 2013
SLC22A8	4-ALLYLPHENOL SULFATE	in vivo, KO plasma up	p = 0.0262	Bush et al., 2017
SLC22A8	4-VINYLPHENOL SULFATE	in vivo, KO plasma up	p = 0.0180	Bush et al., 2017
SLC22A8	7-HYDROXYFLUPHENAZINE	in vivo, KO plasma up	p = 7E-05	Wu et al., 2013
SLC22A8	7-KETODEOXYCHOLATE	in vivo, KO plasma up	p = 0.0091	Bush et al., 2017
SLC22A8	7-METHYLGUANOSINE	in vivo, KO plasma up	p = 0.0099	Wu et al., 2013
SLC22A8	9-AMINO-NONANOIC ACID	in vivo, KO plasma up	p = 0.0218	Wu et al., 2013
SLC22A8	9-O-ACETYLNEURAMINIC ACID	in vivo, KO plasma up	p = 0.0012	Wu et al., 2013
SLC22A8	BETA-MURICHOLATE	in vivo, KO plasma up	p = 0.0289	Bush et al., 2017
SLC22A8	CATECHOL SULFATE	in vivo, KO plasma up	p = 0.0023	Bush et al., 2017
SLC22A8	CHLOROQUINE	in vivo, KO plasma up	p = 0.0189	Wu et al., 2013
SLC22A8	CHOLIC ACID	in vivo, KO plasma up	p = 0.0018	Bush et al., 2017
SLC22A8	CITRULLINE	in vivo, KO plasma up	p = 0.0413	Bush et al., 2017
SLC22A8	DEHYDROASCORBIC ACID	in vivo, KO plasma up	p= 3E-05	Wu et al., 2013
SLC22A8	DEOXYCARNITINE	in vivo, KO plasma up	p = 0.0295	Bush et al., 2017
SLC22A8	DEOXYCHOLATE	in vivo, KO plasma up	p = 0.0255	Bush et al., 2017
SLC22A8	DIHYDROTETRABENAZINE	in vivo, KO plasma up	p = 0.0202	Wu et al., 2013
SLC22A8	EPICATECHIN-3-O-(3-O-METHYLGALLATE)	in vivo, KO plasma up	p = 0.0125	Wu et al., 2013
SLC22A8	EQUOL GLUCURONIDE	in vivo, KO plasma up	p = 0.0000	Bush et al., 2017
SLC22A8	EQUOL SULFATE	in vivo, KO plasma up	p = 0.0000	Bush et al., 2017
SLC22A8	FLUORESCEIN MONOGLUCURONIDE	in vivo, KO plasma up	p = 0.0042	Wu et al., 2013
SLC22A8	GENTISATE	in vivo, KO plasma up	p = 0.0009	Bush et al., 2017
SLC22A8	GLUCORONATE	in vivo, KO plasma up	p = 0.0195	Bush et al., 2017
SLC22A8	HOMOSTACHYDRINE	in vivo, KO plasma up	p = 0.0233	Bush et al., 2017
SLC22A8	HYPOTAURINE	in vivo, KO plasma up	p = 0.0413	Bush et al., 2017
SLC22A8	IMIDAZOLEPROPIONATE	in vivo, KO plasma up	p = 0.0070	Bush et al., 2017
SLC22A8	INDOLE-3-CARBOXYLIC ACID	in vivo, KO plasma up	p = 0.0060	Bush et al., 2017
SLC22A8	INDOLEACETATE	in vivo, KO plasma up	p = 0.0088	Bush et al., 2017
SLC22A8	INDOLELACTATE	in vivo, KO plasma up	p = 0.0000	Bush et al., 2017
SLC22A8	INDOLIN-2-ONE	in vivo, KO plasma up	p = 0.0040	Bush et al., 2017
SLC22A8	INDOXYL SULFATE	in vivo, KO plasma up	p = 0.0008	Bush et al., 2017
SLC22A8	LICUROSIDE	in vivo, KO plasma up	p = 0.0075	Wu et al., 2013
SLC22A8	MANNITOL	in vivo, KO plasma up	p = 0.0473	Bush et al., 2017
SLC22A8	MEVALONATE	in vivo, KO plasma up	p = 0.0188	Bush et al., 2017
SLC22A8	N-ACETYLTRYPTOPHAN	in vivo, KO plasma up	p = 0.0175	Bush et al., 2017
SLC22A8	N-DELTA-ACETYLORNITHINE	in vivo, KO plasma up	p = 0.0486	Bush et al., 2017
SLC22A8	O-METHYLCATECHOL SULFATE	in vivo, KO plasma up	p = 0.0163	Bush et al., 2017
SLC22A8	P-CRESOL GLUCURONIDE	in vivo, KO plasma up	p = 0.0198	Bush et al., 2017
SLC22A8	P-CRESOL SULFATE	in vivo, KO plasma up	p = 0.0154	Bush et al., 2017
SLC22A8	PHENOL SULFATE	in vivo, KO plasma up	p = 0.0035	Bush et al., 2017
SLC22A8	PHENYLLACTATE	in vivo, KO plasma up	p = 0.0000	Bush et al., 2017
SLC22A8	PONGAMOSIDE A	in vivo, KO plasma up	p = 0.0325	Wu et al., 2013
SLC22A8	PYRIDOXAL	in vivo, KO plasma up	p = 0.0330	Bush et al., 2017
SLC22A8	PYRIDOXIC ACID	in vivo, KO plasma up	p = 0.0381	Bush et al., 2017
SLC22A8	SALICYLATE	in vivo, KO plasma up	p = 0.0045	Bush et al., 2017
SLC22A8	SEBACATE	in vivo, KO plasma up	p = 0.0166	Bush et al., 2017
SLC22A8	SEROTONIN	in vivo, KO plasma up	p = 0.0065	Bush et al., 2017
SLC22A8	STACHYDRINE	in vivo, KO plasma up	p = 0.0360	Bush et al., 2017
SLC22A8	SUCCINYLCARNITINE	in vivo, KO plasma up	p = 0.0332	Bush et al., 2017
SLC22A8	SULFAQUINOXALINE	in vivo, KO plasma up	p = 0.0099	Wu et al., 2013
SLC22A8	TETRADECANEDIOATE	in vivo, KO plasma up	p = 0.0037	Bush et al., 2017
SLC22A8	THYMIDINE	in vivo, KO plasma up	p < 0.01	Vallon et al., 2008
SLC22A8	TRICOSANAMIDE	in vivo, KO plasma up	p = 0.0351	Wu et al., 2013
SLC22A8	TRIGONELLINE	in vivo, KO plasma up	p = 0.0351	Bush et al., 2017
SLC22A8	TRIMETHYLAMINE-N-OXIDE	in vivo, KO plasma up	p = 0.0002	Bush et al., 2017
SLC22A8	URSODEOXYCHOLATE	in vivo, KO plasma up	p = 0.0086	Bush et al., 2017
SLC22A8	4-HYDROXYPHENYLACETATE	in vivo, KO urine down	p < 0.05	Wu et al., 2013
SLC22A8	CITRATE	in vivo, KO urine down	p < 0.05	Wu et al., 2013
SLC22A9	PROGESTERONE	GWAS, rs112295236	p=8.00E-12	Ruth et al., 2015
SLC22A9	ETIOCHOLANOLONE GLUCURONIDE	GWAS, rs113747568	p=5.27E-28	Long et al., 2017
SLC22A9	TYRAMINE O-SULFATE	GWAS, rs397740636	P=2.06E-06	Long et al., 2017
SLC22A9	BUTYRATE	in vitro, Xenopus oocytes	trans-stimulates transport p<0.001	Shin et al., 2007
SLC22A9	DEHYDROEPIANDROSTERONE SULFATE	in vitro, Xenopus oocytes	Km: 2.2 uM	Shin et al., 2007
SLC22A9	ESTRONE SULFATE	in vitro, Xenopus oocytes	Km: 8.7 uM	Shin et al., 2007
SLC22A9	NICOTINATE	in vitro, Xenopus oocytes	trans-stimulates transport p<0.01	Shin et al., 2007
SLC22A9	PROPIONATE	in vitro, Xenopus oocytes	trans-stimulates transport p<0.01	Shin et al., 2007
SLC22A9	VALERATE	in vitro, Xenopus oocytes	trans-stimulates transport p<0.001	Shin et al., 2007
SLC22A10	ETIOCHOLANOLONE GLUCURONIDE	GWAS, rs112753913	p=1.88E-27	Long et al., 2017
SLC22A10	EPIANDROSTERONE SULFATE	GWAS, rs1939769	p=2.06E-07	Shin et al., 2014
SLC22A11	URIC ACID	GWAS, rs2078267	p=9.00E-38	Kottgen et al., 2012
SLC22A11	16Α-HYDROXYDEHYDROEPIANDROSTERONE SULFATE	in vitro, COS-7	Km: 7.35±3.50 uM	Tomi et al., 2015
SLC22A11	DEHYDROEPIANDROSTERONE SULFATE	in vitro, HEK293	inhibits 6CF uptake, p<0.001	Hagos et al., 2007
SLC22A11	ESTRONE SULFATE	in vitro, HEK293	Km: 1.1±0.2 uM	Hagos et al., 2007
SLC22A11	FUMARATE	in vitro, HEK293	inhibits 6CF uptake, p<0.05	Hagos et al., 2007
SLC22A11	PYRIDOXIC ACID	in vitro, HEK293	confirmed uptake, p<0.01	Shen et al., 2018
SLC22A11	SUCCINATE	in vitro, HEK293	inhibits 6CF uptake, p<0.05	Hagos et al., 2007
SLC22A11	URIC ACID	in vitro, HEK293	Km: 106.0±45.9 uM	Hagos et al., 2007
SLC22A11	PROSTAGLANDIN E2	in vitro, proximal tubule cells S2	Km: 154±12.1 nM	Kimura et al., 2002
SLC22A11	PROSTAGLANDIN F2	in vitro, proximal tubule cells S2	Km: 154±12.1 nM	Kimura et al., 2002
SLC22A12	UREA	GWAS, rs504915	p=3.00E-63	Okada et al., 2012
SLC22A12	LACTATE	in vitro, Xenopus oocytes	trans-stimulates urate transport, p<0.05	Enomoto et al., 2002
SLC22A12	NICOTINATE	in vitro, Xenopus oocytes	trans-stimulates urate transport, p<0.05	Enomoto et al., 2002
SLC22A12	SALICYLATE	in vitro, Xenopus oocytes	21.9±3.4% urate uptake	Enomoto et al., 2002
SLC22A12	OROTATE	in vitro, Xenopus oocytes	26.5±4.9% urate uptake	Enomoto et al., 2002
SLC22A12	SUCCINATE	in vitro, Xenopus oocytes	23.7±5.2% urate uptake (10mM)	Enomoto et al., 2002
SLC22A12	URIC ACID	in vitro, Xenopus oocytes	Km: 371±28 uM	Enomoto et al., 2002
SLC22A13	AMINOHIPPURIC ACID	in vitro, Xenopus oocytes	uptake: 137.4±8.8 fmol/oocyte/30min	Bahn et al., 2008
SLC22A13	ESTRONE SULFATE	in vitro, Xenopus oocytes	inhibited PAH transport, p<0.001	Bahn et al., 2008
SLC22A13	LACTATE	in vitro, Xenopus oocytes	trans-stimulates transport, p<0.001	Bahn et al., 2008
SLC22A13	NICOTINATE	in vitro, Xenopus oocytes	Km: 22 uM	Bahn et al., 2008
SLC22A13	SALICYLATE	in vitro, Xenopus oocytes	inhibited PAH transport, p<0.05	Bahn et al., 2008
SLC22A13	SUCCINATE	in vitro, Xenopus oocytes	trans-stimulates transport, p<0.01	Bahn et al., 2008
SLC22A13	URIC ACID	in vitro, Xenopus oocytes	IC50: 759±501 uM; uptake: 3.2±0.2 fmol/oocyte/30min	Bahn et al., 2008
SLC22A15	ERGOTHIONEINE	GWAS, rs10802146	p=9.52E-05	Shin et al., 2014
SLC22A15	GLYCEROL-3-PHOSPHATE	GWAS, rs17515267	p=1.05E-05	Shin et al., 2014
SLC22A15	CITRULLINE	GWAS, rs2486079	p=4.08E-05	Shin et al., 2014
SLC22A15	1-PALMITOLEOYLGLYCEROL(16:1)	GWAS, rs35415357	p=5.27E-06	Long et al., 2017
SLC22A15	1-STEAROYL-2-MEADOYL-GPC(18:0/20:3N9)	GWAS, rs74111156	p=6.04E-06	Long et al., 2017
SLC22A15	1-PALMITOYL-2-MEADOYL-GPC(16:0/20:3N9)	GWAS, rs80155800	p=2.22E-06	Long et al., 2017
SLC22A15	PYRIDOXINE	Homology with (S. pompe) gene bsu1+	25% AA identity, 40% homology	Hediger et al., 2013
SLC22A16	BUTYRYLCARNITINE	GWAS, rs12195708	p=8.64E-09	Burkhardt et al., 2015
SLC22A16	2-HYDROXYISOVALERYLCARNITINE	GWAS, rs12210538	p=1.16E-10	Burkhardt et al., 2015
SLC22A16	ACETYLCARNITINE	GWAS, rs12210538	p=7.67E-29	Burkhardt et al., 2015
SLC22A16	ACYLCARNITINE	GWAS, rs12210538	p=5.03E-21	Draisma et al., 2015
SLC22A16	CARNITINE	GWAS, rs12210538	p=6.07E-25	Burkhardt et al., 2015
SLC22A16	CIS-11,14,17-EICOSATRIENOICACIDMETHYLESTER	GWAS, rs12210538	p=2.06E-08	Burkhardt et al., 2015
SLC22A16	CORTISOL	GWAS, rs12210538	p=9.19E-06	Shin et al., 2014
SLC22A16	DECANOYLCARNITINE	GWAS, rs12210538	p=3.27E-10	Burkhardt et al., 2015
SLC22A16	LINOELAIDIC ACID	GWAS, rs12210538	p=8.94E-20	Burkhardt et al., 2015
SLC22A16	MYRISTOYLCARNITINE	GWAS, rs12210538	p=2.20E-08	Burkhardt et al., 2015
SLC22A16	OCTANOYLCARNITINE	GWAS, rs12210538	p=3.15E-32	Burkhardt et al., 2015
SLC22A16	PALMITOYLCARNITINE	GWAS, rs12210538	p=7.34E-31	Burkhardt et al., 2015
SLC22A16	PROPIONYLCARNITINE	GWAS, rs12210538	p=2.95E-25	Burkhardt et al., 2015
SLC22A16	STEAROYLCARNITINE	GWAS, rs12210538	p=2.02E-19	Burkhardt et al., 2015
SLC22A16	GAMMA-GLUTAMYLPHENYLALANINE	GWAS, rs17579044	p=5.90E-05	Shin et al., 2014
SLC22A16	ERGOTHIONEINE	GWAS, rs761590	p=6.15E-07	Shin et al., 2014
SLC22A18	CAPRATE(10:0)	GWAS, rs384037	p=8.54E-05	Shin et al., 2014
SLC22A18	SERINE	GWAS, rs450208	p=2.75E-05	Shin et al., 2014
SLC22A20	INDOLEACETATE	GWAS, rs2904981	p=4.55E-05	Shin et al., 2014
SLC22A20	4-BROMOBUTYRIC ACID	in vitro, CHO	IC50: 1346 uM	Wu et al., 2015
SLC22A20	6-BROMOHEXANOIC ACID	in vitro, CHO	IC50: 16 uM	Wu et al., 2015
SLC22A20	HEXYL ACETATE	in vitro, CHO	IC50: 1149 uM	Wu et al., 2015
SLC22A20	METHYL OCTANOATE	in vitro, CHO	IC50: 158 uM	Wu et al., 2015
SLC22A20	2-ETHYLHEXANOATE	in vitro, Xenopus oocytes	IC50: 6.6±3.1 uM	Kaler et al., 2006
SLC22A20	2-METHYLBUTYRATE	in vitro, Xenopus oocytes	IC50: 40.7±0.5 uM	Kaler et al., 2006
SLC22A20	3-METHYLBUTYRATE	in vitro, Xenopus oocytes	IC50: 32.3±3.4 uM	Kaler et al., 2006
SLC22A20	AMINOHIPPURIC ACID	in vitro, Xenopus oocytes	IC50: 446±98 uM	Kaler et al., 2006
SLC22A20	BENZOATE	in vitro, Xenopus oocytes	IC50: 13.8±2.5 uM	Kaler et al., 2006
SLC22A20	ESTRONE SULFATE	in vitro, Xenopus oocytes	IC50: 58±10 uM	Kaler et al., 2006
SLC22A20	HEPTANOATE	in vitro, Xenopus oocytes	IC50: 8.2±0.8 uM	Kaler et al., 2006
SLC22A20	PROPIONATE	in vitro, Xenopus oocytes	IC50: 279±147 uM	Kaler et al., 2006
SLC22A22	12-HYDROXYEICOSATETRAENOIC ACID	in vitro, proximal tubule cells S2	inhibited PGE2 uptake, p<0.001	Shiraya et al., 2010
SLC22A22	15-HYDROPEROXYEICOSATETRAENOIC ACID	in vitro, proximal tubule cells S2	inhibited PGE2 uptake, p<0.01	Shiraya et al., 2010
SLC22A22	15-HYDROXYEICOSATETRAENOIC ACID	in vitro, proximal tubule cells S2	inhibited PGE2 uptake, p<0.001	Shiraya et al., 2010
SLC22A22	DEHYDROEPIANDROSTERONE SULFATE	in vitro, proximal tubule cells S2	inhibited PGE2 uptake, p<0.01	Shiraya et al., 2010
SLC22A22	PROSTAGLANDIN B2	in vitro, proximal tubule cells S2	inhibited PGE2 uptake, p<0.001	Shiraya et al., 2010
SLC22A22	PROSTAGLANDIN D2	in vitro, proximal tubule cells S2	Km: 371.6 ± 58.1 nM	Shiraya et al., 2010
SLC22A22	PROSTAGLANDIN E1	in vitro, proximal tubule cells S2	Km: 156.8 ± 18.9 nM	Shiraya et al., 2010
SLC22A22	PROSTAGLANDIN E2	in vitro, proximal tubule cells S2	Km: 118.3 ± 3.0 nM	Shiraya et al., 2010
SLC22A22	PROSTAGLANDIN F2	in vitro, proximal tubule cells S2	Km: 158.2 ± 18.7 nM	Shiraya et al., 2010
SLC22A22	PROSTAGLANDIN G2	in vitro, proximal tubule cells S2	inhibited PGE2 uptake, p<0.001	Shiraya et al., 2010
SLC22A22	PROSTAGLANDIN H2	in vitro, proximal tubule cells S2	inhibited PGE2 uptake, p<0.001	Shiraya et al., 2010
SLC22A22	SUCCINATE	in vitro, proximal tubule cells S2	inhibited PGE2 uptake, p<0.01	Shiraya et al., 2010
SLC22A23	BILIRUBIN	GWAS, rs11759126	p=2.30E-05	Shin et al., 2014
SLC22A23	3-METHYLHISTIDINE	GWAS, rs142766726	p=4.78E-06	Long et al., 2017
SLC22A23	BENZOATE	GWAS, rs1475475	p=3.53E-05	Shin et al., 2014
SLC22A23	5ALPHA-ANDROSTAN-3BETA,17BETA-DIOLDI SULFATE	GWAS, rs4959232	p=1.70E-05	Shin et al., 2014
SLC22A23	2-PALMITOYL-GPC(16:0)	GWAS, rs7746773	p=6.26E-06	Long et al., 2017
SLC22A23	OLEOYLETHANOLAMIDE	GWAS, rs7756837	p=8.08E-06	Shin et al., 2014
SLC22A23	1-LINOLEOYL-GPI(18:2)	GWAS, rs7770437	p=9.95E-06	Long et al., 2017
SLC22A23	2-HYDROXYPALMITATE	GWAS, rs7770437	p=9.68E-07	Long et al., 2017
SLC22A23	2-HYDROXYSTEARATE	GWAS, rs7770437	p=9.87E-06	Long et al., 2017
SLC22A23	2-OLEOYL-GPC(18:1)	GWAS, rs7770437	p=5.09E-07	Long et al., 2017
SLC22A23	PROPIONYLCARNITINE	GWAS, rs9503551	p=3.75E-06	Shin et al., 2014
SLC22A23	UNDECANOATE(11:0)	GWAS, rs979306	p=9.95E-05	Shin et al., 2014
SLC22A24	ETIOCHOLANOLONE GLUCURONIDE	GWAS, rs113532193	p=5.90E-37	Long et al., 2017
SLC22A24	PREGNANEDIOL-3-GLUCURONIDE	GWAS, rs202187460	p=5.91E-07	Long et al., 2017
SLC22A24	ANDROSTANEDIOL GLUCURONIDE	in vitro, HEK293 Flp-In	IC50: 21±11 uM	Yee et al., 2019
SLC22A24	CHENODEOXYCHOLATE	in vitro, HEK293 Flp-In	IC50: 2.6±1.0 uM	Yee et al., 2019
SLC22A24	ESTRADIOL GLUCURONIDE	in vitro, HEK293 Flp-In	3-5 fold over vector control	Yee et al., 2019
SLC22A24	ESTRONE SULFATE	in vitro, HEK293 Flp-In	5-10 fold over vector control	Yee et al., 2019
SLC22A24	ETIOCHOLANOLONE GLUCURONIDE	in vitro, HEK293 Flp-In	IC50: 29±4.7 uM	Yee et al., 2019
SLC22A24	PREGNANEDIOL-3-GLUCURONIDE	in vitro, HEK293 Flp-In	IC50: >200uM	Yee et al., 2019
SLC22A24	PREGNENOLONE SULFATE	in vitro, HEK293 Flp-In	IC50: 1.4±0.1 uM	Yee et al., 2019
SLC22A24	PROGESTERONE	in vitro, HEK293 Flp-In	IC50: 7.4±3.0 uM	Yee et al., 2019
SLC22A24	TAUROCHOLIC ACID	in vitro, HEK293 Flp-In	10-20 fold over vector control	Yee et al., 2019
SLC22A24	URSODEOXYCHOLATE	in vitro, HEK293 Flp-In	IC50: 7.6±1.2 uM	Yee et al., 2019
SLC22A25	ETIOCHOLANOLONE GLUCURONIDE	GWAS, rs113950742	p=4.12E-27	Long et al., 2017

## Sheet: OATS1
GENE	METABOLITE	Source (GWAS, in vitro, in vivo)	Metrics	Citation
SLC22A6	2-ETHYLHEXANOATE	GWAS, rs11568621	p=3.21E-05	Shin et al., 2014
SLC22A6	2-HYDROXY-3-METHYLVALERATE	GWAS, rs11568629	p=6.54E-05	Shin et al., 2014
SLC22A6	2-HYDROXYISOVALERATE	in vitro, CHO	IC50: 45.3 uM	Wu et al., 2016
SLC22A6	2-OXO-3-METHYLVALERATE	in vitro, CHO	IC50: 1012 uM	Wu et al., 2016
SLC22A6	2-OXO-3-METHYLVALERATE	in vitro, CHO	Km: 15.4 uM	Ho et al., 2000
SLC22A6	3-HYDROXYBUTYRATE	in vitro, CHO	IC50: 444 uM	Wu et al., 2016
SLC22A6	3-HYDROXYISOBUTYRATE	in vitro, CHO	Km: 10.7±1.6 uM	Cihlar et al., 1999
SLC22A6	3-HYDROXYPROPIONATE	in vitro, CHO	IC50: 998 uM	Wu et al., 2016
SLC22A6	3-HYDROXYVALERATE	in vitro, HEK293	Km: 33.0±5.3 uM	Shen et al., 2018
SLC22A6	3-METHYLCROTONYLGLYCINE	in vitro, HEK293	Km: 197.6±67.6 uM	Sato et al., 2008
SLC22A6	4-BROMOBUTYRIC ACID	in vitro, HEK293 Flp-In	Km: 238 uM	Nakakariya et al., 2009
SLC22A6	4-HYDROXYPHENYLACETATE	in vitro, proximal tubule cells S2	Km: 970±48.3 nM	Kimura et al., 2002
SLC22A6	4-HYDROXYPHENYLLACTATE	in vitro, proximal tubule cells S2	Km: 575±43.2 nM	Kimura et al., 2002
SLC22A6	4-HYDROXYPHENYLPYRUVATE	in vitro, Xenopus oocytes	IC50: 57±21 uM	Kaler et al., 2006
SLC22A6	4-METHYL-2-OXOPENTANOATE	in vitro, Xenopus oocytes	exchange for PAH	Lopez-Nieto et al., 1997
SLC22A6	5-METHYLCYTIDINE	in vitro, Xenopus oocytes	Ki: 3500 uM	Kaler et al., 2007
SLC22A6	6-BROMOHEXANOIC ACID	in vitro, Xenopus oocytes	IC50: 57±21 uM	Kaler et al., 2006
SLC22A6	ALPHA-KETOGLUTARATE	in vitro, Xenopus oocytes	Ki: 5.41 uM	Kaler et al., 2007
SLC22A6	AMINOHIPPURIC ACID	in vitro, Xenopus oocytes	IC50: 8180 uM	Kaler et al., 2006
SLC22A6	AMYL HEXANOATE	in vivo, glomerular creatinine filtration	up, p<0.05	Vallon et al., 2012
SLC22A6	BENZOATE	in vivo, KO plasma	up, p=0.032	Eraly et al., 2006
SLC22A6	BUYTRATE	in vivo, KO plasma	up, p=0.007	Eraly et al., 2006
SLC22A6	CITRULLINE	in vivo, KO plasma	up, p=0.002	Eraly et al., 2006
SLC22A6	CREATININE	in vivo, KO plasma	up, p=0.032	Eraly et al., 2006
SLC22A6	GLUTARATE	in vivo, KO plasma	up. p=0.024	Eraly et al., 2006
SLC22A6	HEPTANOATE	in vivo, KO plasma	up, p=1.7E-2	Wikoff et al., 2011
SLC22A6	HEXANOYLGLYCINE	in vivo, KO plasma	up, p=8.1E-3	Wikoff et al., 2011
SLC22A6	HEXYL ACETATE	in vivo, KO plasma	up, p=3.7E-2	Wikoff et al., 2011
SLC22A6	INDOLELACTATE	in vivo, KO plasma	up, p=1.5E-2	Wikoff et al., 2011
SLC22A6	INDOXYL SULFATE	in vivo, KO plasma	up, p=1.7E-4	Wikoff et al., 2011
SLC22A6	KYNURENINE	in vivo, KO plasma	up, p=1.3E-3	Wikoff et al., 2011
SLC22A6	METHIONINE	in vivo, KO plasma	up, p=1.1E-2	Wikoff et al., 2011
SLC22A6	N-ACETYLASPARTATE	in vivo, KO plasma	up, p=6.4E-4	Wikoff et al., 2011
SLC22A6	N-ACETYLGLYCINE	in vivo, KO plasma	up, p=1.5E-4	Wikoff et al., 2011
SLC22A6	N-METHYLADENOSINE	in vivo, KO plasma/urine	up, p=0.009/down, p=0.000	Eraly et al., 2006
SLC22A6	N2,N2-DIMETHYLGUANOSINE	in vivo, KO plasma/urine	up. p=0.040/down, p=0.006	Eraly et al., 2006
SLC22A6	OCTANOATE	in vivo, KO urine	down, p=0.001	Eraly et al., 2006
SLC22A6	OROTATE	in vivo, KO urine	down, p=0.014	Eraly et al., 2006
SLC22A6	P-CRESOL SULFATE	in vivo, KO urine	down, p=0.026	Eraly et al., 2006
SLC22A6	P-HYDROXYPHENYLLACTIC ACID	in vivo, KO urine	down, p=0.012	Eraly et al., 2006
SLC22A6	PANTOTHENIC ACID	in vivo, KO urine	down, p=0.000	Eraly et al., 2006
SLC22A6	PHENOL SULFATE	in vivo, KO urine	down, p=0.018	Eraly et al., 2006
SLC22A6	PHENYLACETYLGLYCINE	in vivo, KO urine	down, p=8.08E-4	Wikoff et al., 2011
SLC22A6	PROPIONATE	in vivo, KO urine	down, p=0.002	Eraly et al., 2006
SLC22A6	PROPIONYLGLYCINE	in vivo, KO urine	down, p=6.11E-3	Wikoff et al., 2011
SLC22A6	PROSTAGLANDIN E2	in vivo, KO urine	down, p=3.13E-2	Wikoff et al., 2011
SLC22A6	PROSTAGLANDIN F2	in vivo, KO urine	down, p=5.58E-6	Wikoff et al., 2011
SLC22A6	PYRIDOXIC ACID	in vivo, KO urine	down, p=0.000	Eraly et al., 2006
SLC22A6	PYRIDOXIC ACID	in vivo, KO urine	down, p=1.54E-4	Wikoff et al., 2011
SLC22A6	THYMIDINE	in vivo, KO urine	down, p=0.004	Eraly et al., 2006
SLC22A6	URACIL	in vivo, KO urine	down, p=5.10E-4	Wikoff et al., 2011
SLC22A6	URIC ACID	in vivo, KO urine	down, p=0.002	Eraly et al., 2006
SLC22A6	URIC ACID	in vivo, KO urine	down, p=6.74E-5	Wikoff et al., 2011
SLC22A6	XANTHURENIC ACID	in vivo, KO urine	down, p=6.74E-5	Wikoff et al., 2011
SLC22A6	CYSTEINE	in vivo, KO plasma	up, p < 0.05	Wu et al, 2017
SLC22A6	KYNURENATE	in vivo, KO plasma	up, p < 0.05	Wu et al, 2017
SLC22A6	S-Adenosylhomocysteine	in vivo, KO plasma	up, p < 0.10	Wu et al, 2017
SLC22A6	3-hydroxykynurenine	in vitro, COS7-mOAT3, inhibition of 6-CF or PAH	p <0.001	Bahn et al., 2005
SLC22A6	quinolinate	in vitro, COS7-mOAT3, inhibition of 6-CF	p <0.001	Bahn et al., 2005
SLC22A6	anthranilate	in vitro, COS7-mOAT3, inhibition of 6-CF	p <0.001	Bahn et al., 2005
SLC22A6	5-hydroxyindoleacetic acid	in vitro, COS7-mOAT3, inhibition of 6-CF	p <0.001	Bahn et al., 2005
SLC22A6	picolinate	in vitro, COS7-mOAT3, inhibition of 6-CF	p <0.001	Bahn et al., 2005
SLC22A6	hexadecanedioate	in vitro, HEK293-OAT1	p < 0.001	Yee et al., 2016
SLC22A6	tetradecaNEDIOATE	in vitro, HEK293-OAT1	p < 0.001	Yee et al., 2016
SLC22A8	1-METHYLIMIDAZOLEACETATE	GWAS, rs10792367	p=8.16E-05	Shin et al., 2014
SLC22A8	2-AMINO-3-HYDROXY-5-NITROBENZOPHENONE GLUCURONIDE	in vitro hOAT3, HEK293	km 7.94±1.42 uM	Wong et al., 2011b
SLC22A8	2-AMINOPHENOL SULFATE	in vitro hOAT3, HEK293	km 17.6±3.9 uM	Wong et al., 2011b
SLC22A8	2-HYDROXYDECANOATE	in vitro hOAT3, HEK293	km 5.25±0.86 uM	Wong et al., 2011b
SLC22A8	2-OXINDOLE-3-ACETATE	in vitro rOAT3, LLC-PK1	km 174±24 uM	Deguchi et al., 2004
SLC22A8	2-OXO-9-METHYLTHIONONANOIC ACID	in vitro rOAT3, LLC-PK2	km 10.9±2 uM	Deguchi et al., 2004
SLC22A8	3-CARBOXY-4-METHYL-5-PROPYL-2-FURANPROPIONATE	in vitro, COS7-OAT3	km 2.18 uM	Duan et al., 2009
SLC22A8	3-DEHYDROCARNITINE	in vitro, HEK293	Km: 350±11 uM	Chen et al., 2008
SLC22A8	3-HYDROXYHEXANOATE	in vitro, HEK293	Km: 52.1±15.3 uM	Shen et al., 2018
SLC22A8	3-HYDROXYPROMAZINE GLUCURONIDE	in vitro, HEK293	Km: 380.3±106.2 uM	Sato et al., 2008
SLC22A8	4-ALLYLPHENOL SULFATE	in vitro, hOAT3 HEK293	137±33 uM	Chen et al., 2008
SLC22A8	4-HYDROXYPHENYLACETATE	in vitro, hOAT3 HEK293	554±86 uM	Chen et al., 2008
SLC22A8	4-VINYLPHENOL SULFATE	in vitro, hOAT3 HEK293	188±20 uM	Chen et al., 2008
SLC22A8	7-HYDROXYFLUPHENAZINE	in vitro, hOAT3 HEK293	54.1±3.7 uM	Chen et al., 2008
SLC22A8	7-KETODEOXYCHOLATE	in vitro, hOAT3 HEK293	77.0±8.3 uM	Chen et al., 2008
SLC22A8	7-METHYLGUANOSINE	in vitro, Lymphocytes	Km: 87.2 uM	Cha et al., 2001
SLC22A8	9-AMINO-NONANOIC ACID	in vitro, Lymphocytes	inhibits estrone sulfate transport, p<0.01	Cha et al., 2001
SLC22A8	9-O-ACETYLNEURAMINIC ACID	in vitro, Lymphocytes	inhibits estrone sulfate transport, p<0.001	Cha et al., 2001
SLC22A8	AMINOHIPPURIC ACID	in vitro, Lymphocytes	inhibits estrone sulfate transport, p<0.001	Cha et al., 2001
SLC22A8	BETA-MURICHOLATE	in vitro, Lymphocytes	inhibits estrone sulfate transport, p<0.01	Cha et al., 2001
SLC22A8	BISPHOSPHONATE	in vitro, Lymphocytes	inhibits estrone sulfate transport, p<0.01	Cha et al., 2001
SLC22A8	CATECHOL SULFATE	in vitro, Lymphocytes	inhibits estrone sulfate transport, p<0.01	Cha et al., 2001
SLC22A8	CHENODEOXYCHOLATE	in vitro, Lymphocytes	inhibits estrone sulfate transport, p<0.05	Cha et al., 2001
SLC22A8	CHLOROQUINE	in vitro, OAT3 oocyte	IC50 using estrone sulfate 142±15 uM	Vallon et al., 2008
SLC22A8	CHOLIC ACID	in vitro, OAT3 oocyte	IC50 using estrone sulfate 384±25 uM	Vallon et al., 2008
SLC22A8	CHOLIC ACID	in vitro, OAT3 oocytes	p < 0.0001	Vallon et al., 2012
SLC22A8	CHOLIC ACID	in vitro, proximal tubule cells S2	Km: 345±42.1 nM	Kimura et al., 2002
SLC22A8	CITRATE	in vitro, proximal tubule cells S2	Km: 575±43.2 nM	Kimura et al., 2002
SLC22A8	CITRULLINE	in vitro, rOat3, Xl oocyes	Km 274 ± 100 μmol/L	Mori et al., 2003
SLC22A8	CREATININE	in vivo, glomerular creatinine filtration	up, p<0.05	Vallon et al., 2012
SLC22A8	CREATININE	in vivo, KO plasma up	p = 0.0188	Bush et al., 2017
SLC22A8	DEHYDROASCORBIC ACID	in vivo, KO plasma up	p = 0.0081	Wu et al., 2013
SLC22A8	DEHYDROEPIANDROSTERONE SULFATE	in vivo, KO plasma up	p = 0.0082	Bush et al., 2017
SLC22A8	DEOXYCARNITINE	in vivo, KO plasma up	p = 0.0143	Bush et al., 2017
SLC22A8	DEOXYCHOLATE	in vivo, KO plasma up	p = 0.0028	Bush et al., 2017
SLC22A8	DEOXYCHOLIC ACID	in vivo, KO plasma up	p = 0.0102	Wu et al., 2013
SLC22A8	DIHYDROTETRABENAZINE	in vivo, KO plasma up	p = 0.0127	Bush et al., 2017
SLC22A8	EPICATECHIN-3-O-(3-O-METHYLGALLATE)	in vivo, KO plasma up	p = 0.0211	Wu et al., 2013
SLC22A8	EQUOL GLUCURONIDE	in vivo, KO plasma up	p = 0.0262	Bush et al., 2017
SLC22A8	EQUOL SULFATE	in vivo, KO plasma up	p = 0.0180	Bush et al., 2017
SLC22A8	ESTRONE SULFATE	in vivo, KO plasma up	p = 7E-05	Wu et al., 2013
SLC22A8	FLAVIN MONONUCLEOTIDE	in vivo, KO plasma up	p = 0.0091	Bush et al., 2017
SLC22A8	FLUORESCEIN MONOGLUCURONIDE	in vivo, KO plasma up	p = 0.0099	Wu et al., 2013
SLC22A8	GENISTEIN-7-O-GLUCURONIDE	in vivo, KO plasma up	p = 0.0218	Wu et al., 2013
SLC22A8	GENTISATE	in vivo, KO plasma up	p = 0.0012	Wu et al., 2013
SLC22A8	GLUCORONATE	in vivo, KO plasma up	p = 0.0289	Bush et al., 2017
SLC22A8	GLUTARATE	in vivo, KO plasma up	p = 0.0023	Bush et al., 2017
SLC22A8	GLYCHOCHENODEOXYCHOLIC ACID	in vivo, KO plasma up	p = 0.0189	Wu et al., 2013
SLC22A8	GLYCITEIN-7-O-GLUCURONIDE	in vivo, KO plasma up	p = 0.0018	Bush et al., 2017
SLC22A8	GLYCOCHOLIC ACID	in vivo, KO plasma up	p = 0.0413	Bush et al., 2017
SLC22A8	HOMOSTACHYDRINE	in vivo, KO plasma up	p= 3E-05	Wu et al., 2013
SLC22A8	HOMOVANILLIC ACID	in vivo, KO plasma up	p = 0.0295	Bush et al., 2017
SLC22A8	HYPOTAURINE	in vivo, KO plasma up	p = 0.0255	Bush et al., 2017
SLC22A8	IMIDAZOLEPROPIONATE	in vivo, KO plasma up	p = 0.0202	Wu et al., 2013
SLC22A8	INDOLE-3-CARBOXYLIC ACID	in vivo, KO plasma up	p = 0.0125	Wu et al., 2013
SLC22A8	INDOLEACETATE	in vivo, KO plasma up	p = 0.0000	Bush et al., 2017
SLC22A8	INDOLELACTATE	in vivo, KO plasma up	p = 0.0000	Bush et al., 2017
SLC22A8	INDOLIN-2-ONE	in vivo, KO plasma up	p = 0.0042	Wu et al., 2013
SLC22A8	INDOXYL SULFATE	in vivo, KO plasma up	p = 0.0009	Bush et al., 2017
SLC22A8	INDOXYL SULFATE	in vivo, KO plasma up	p = 0.0195	Bush et al., 2017
SLC22A8	LICUROSIDE	in vivo, KO plasma up	p = 0.0233	Bush et al., 2017
SLC22A8	MANNITOL	in vivo, KO plasma up	p = 0.0413	Bush et al., 2017
SLC22A8	MEVALONATE	in vivo, KO plasma up	p = 0.0070	Bush et al., 2017
SLC22A8	N-ACETYLTRYPTOPHAN	in vivo, KO plasma up	p = 0.0060	Bush et al., 2017
SLC22A8	N-DELTA-ACETYLORNITHINE	in vivo, KO plasma up	p = 0.0088	Bush et al., 2017
SLC22A8	O-METHYLCATECHOL SULFATE	in vivo, KO plasma up	p = 0.0000	Bush et al., 2017
SLC22A8	P-CRESOL GLUCURONIDE	in vivo, KO plasma up	p = 0.0040	Bush et al., 2017
SLC22A8	P-CRESOL SULFATE	in vivo, KO plasma up	p = 0.0008	Bush et al., 2017
SLC22A8	PHENOL SULFATE	in vivo, KO plasma up	p = 0.0075	Wu et al., 2013
SLC22A8	PHENYLLACTATE	in vivo, KO plasma up	p = 0.0473	Bush et al., 2017
SLC22A8	PONGAMOSIDE A	in vivo, KO plasma up	p = 0.0188	Bush et al., 2017
SLC22A8	PROSTAGLANDIN E2	in vivo, KO plasma up	p = 0.0175	Bush et al., 2017
SLC22A8	PROSTAGLANDIN F2	in vivo, KO plasma up	p = 0.0486	Bush et al., 2017
SLC22A8	PYRIDOXAL	in vivo, KO plasma up	p = 0.0163	Bush et al., 2017
SLC22A8	PYRIDOXIC ACID	in vivo, KO plasma up	p = 0.0198	Bush et al., 2017
SLC22A8	PYRIDOXIC ACID	in vivo, KO plasma up	p = 0.0154	Bush et al., 2017
SLC22A8	QUERCETIN-3′-O-GLUCURONIDE	in vivo, KO plasma up	p = 0.0035	Bush et al., 2017
SLC22A8	SALICYLATE	in vivo, KO plasma up	p = 0.0000	Bush et al., 2017
SLC22A8	SALICYLATE	in vivo, KO plasma up	p = 0.0325	Wu et al., 2013
SLC22A8	SEBACATE	in vivo, KO plasma up	p = 0.0330	Bush et al., 2017
SLC22A8	SEROTONIN	in vivo, KO plasma up	p = 0.0381	Bush et al., 2017
SLC22A8	STACHYDRINE	in vivo, KO plasma up	p = 0.0045	Bush et al., 2017
SLC22A8	SUCCINYLCARNITINE	in vivo, KO plasma up	p = 0.0166	Bush et al., 2017
SLC22A8	SULFAQUINOXALINE	in vivo, KO plasma up	p = 0.0065	Bush et al., 2017
SLC22A8	TAUROCHENODEOXYCHOLIC ACID	in vivo, KO plasma up	p = 0.0360	Bush et al., 2017
SLC22A8	TAUROCHOLIC ACID	in vivo, KO plasma up	p = 0.0332	Bush et al., 2017
SLC22A8	TETRADECANEDIOATE	in vivo, KO plasma up	p = 0.0099	Wu et al., 2013
SLC22A8	TETRAETHYLAMMONIUM	in vivo, KO plasma up	p = 0.0037	Bush et al., 2017
SLC22A8	THYMIDINE	in vivo, KO plasma up	p < 0.01	Vallon et al., 2008
SLC22A8	THYMIDINE	in vivo, KO plasma up	p = 0.0351	Wu et al., 2013
SLC22A8	TRICOSANAMIDE	in vivo, KO plasma up	p = 0.0351	Bush et al., 2017
SLC22A8	TRIGONELLINE	in vivo, KO plasma up	p = 0.0002	Bush et al., 2017
SLC22A8	TRIMETHYLAMINE-N-OXIDE	in vivo, KO plasma up	p = 0.0086	Bush et al., 2017
SLC22A8	URIC ACID	in vivo, KO urine down	p < 0.05	Wu et al., 2013
SLC22A8	URSODEOXYCHOLATE	in vivo, KO urine down	p < 0.05	Wu et al., 2013
SLC22A8	KYNURENINE	in vivo, KO plasma up	p < 0.05	Wu et al, 2017
SLC22A8	3-hydroxykynurenine	in vitro, COS7-mOAT3, inhibition of 6-CF or PAH	p < 0.001	Bahn et al, 2005
SLC22A8	quinolinate	in vitro, COS7-mOAT3, inhibition of 6-CF or PAH	p < 0.001	Bahn et al, 2005
SLC22A8	anthranilate	in vitro, COS7-mOAT3, inhibition of 6-CF or PAH	p < 0.001	Bahn et al, 2005
SLC22A8	5-hydroxyindoleacetic acid	in vitro, COS7-mOAT3, inhibition of 6-CF or PAH	p < 0.001	Bahn et al, 2005
SLC22A8	picolinate	in vitro, COS7-mOAT3, inhibition of 6-CF or PAH	p < 0.001	Bahn et al, 2005
SLC22A8	hexadecanedioate	in vitro, HEK293-OAT3	p < 0.001	Yee et al., 2016
SLC22A8	tetradecaNEDIOATE	in vitro, HEK293-OAT3	p < 0.001	Yee et al., 2016
SLC22A20	INDOLEACETATE	GWAS, rs2904981	p=4.55E-05	Shin et al., 2014
SLC22A20	4-BROMOBUTYRIC ACID	in vitro, CHO	IC50: 1346 uM	Wu et al., 2015
SLC22A20	6-BROMOHEXANOIC ACID	in vitro, CHO	IC50: 16 uM	Wu et al., 2015
SLC22A20	HEXYL ACETATE	in vitro, CHO	IC50: 1149 uM	Wu et al., 2015
SLC22A20	METHYL OCTANOATE	in vitro, CHO	IC50: 158 uM	Wu et al., 2015
SLC22A20	2-ETHYLHEXANOATE	in vitro, Xenopus oocytes	IC50: 6.6±3.1 uM	Kaler et al., 2006
SLC22A20	2-METHYLBUTYRATE	in vitro, Xenopus oocytes	IC50: 40.7±0.5 uM	Kaler et al., 2006
SLC22A20	3-METHYLBUTYRATE	in vitro, Xenopus oocytes	IC50: 32.3±3.4 uM	Kaler et al., 2006
SLC22A20	AMINOHIPPURIC ACID	in vitro, Xenopus oocytes	IC50: 446±98 uM	Kaler et al., 2006
SLC22A20	BENZOATE	in vitro, Xenopus oocytes	IC50: 13.8±2.5 uM	Kaler et al., 2006
SLC22A20	ESTRONE SULFATE	in vitro, Xenopus oocytes	IC50: 58±10 uM	Kaler et al., 2006
SLC22A20	HEPTANOATE	in vitro, Xenopus oocytes	IC50: 8.2±0.8 uM	Kaler et al., 2006
SLC22A20	PROPIONATE	in vitro, Xenopus oocytes	IC50: 279±147 uM	Kaler et al., 2006

## Sheet: OATS2
GENE	METABOLITE	Source (GWAS, in vitro, in vivo)	Metrics	Citation
SLC22A7	2′-DEOXYGUANOSINE	GWAS, rs1574430	p=1.56E-07	Shin et al., 2014
SLC22A7	ALPHA-KETOGLUTARATE	GWAS, rs4149178	p=1.20E-06	Kottgen et al., 2012
SLC22A7	AMINOHIPPURIC ACID	in vitro, EcR293	significant uptake compared to control	Sun et al., 2001
SLC22A7	ASCORBIC ACID	in vitro, EcR293	significant uptake compared to control	Sun et al., 2001
SLC22A7	CAMP	in vitro, EcR293	significant uptake compared to control	Sun et al., 2001
SLC22A7	CARNITINE	in vitro, HEK293	clearance: 20±2 uL/min/mg of protein	Fork et al., 2011
SLC22A7	CGMP	in vitro, HEK293	Km: 88±11 uM	Cropp et al., 2009
SLC22A7	CREATININE	in vitro, HEK293	Km: 795±138 uM	Shen et al., 2015
SLC22A7	DEHYDROEPIANDROSTERONE SULFATE	in vitro, HEK293	clearance: 70±5 uL/min/mg of protein	Fork et al., 2011
SLC22A7	GLUTAMATE	in vitro, HEK293	clearance: 46±1 uL/min/mg of protein	Fork et al., 2011
SLC22A7	GLUTARATE	in vitro, HEK293	clearance: 121±5 uL/min/mg of protein	Fork et al., 2011
SLC22A7	OROTATE	in vitro, proximal tubule cells S2	Km: 713±68.2 uM	Kimura et al., 2002
SLC22A7	PROSTAGLANDIN E2	in vitro, proximal tubule cells S2	Km: 425±53.0 nM	Enomoto et al., 2004
SLC22A7	PROSTAGLANDIN F2	in vitro, Xenopus oocytes	Km: 1.41±0.10 uM	Kobayashi et al., 2005
SLC22A7	TRIGONELLINE	in vitro, Xenopus oocytes	Km: 4.22±0.32 uM	Kobayashi et al., 2005
SLC22A7	URIC ACID	in vitro, Xenopus oocytes	Km: 0.43±0.05 uM	Kobayashi et al., 2005
SLC22A7	URIC ACID	in vitro, Xenopus oocytes	Km: 0.43±0.05 uM	Kobayashi et al., 2005

## Sheet: OATS3
GENE	METABOLITE	Source (GWAS, in vitro, in vivo)	Metrics	Citation
SLC22A11	URIC ACID	GWAS, rs2078267	p=9.00E-38	Kottgen et al., 2012
SLC22A11	16Α-HYDROXYDEHYDROEPIANDROSTERONE SULFATE	in vitro, COS-7	Km: 7.35±3.50 uM	Tomi et al., 2015
SLC22A11	DEHYDROEPIANDROSTERONE SULFATE	in vitro, HEK293	inhibits 6CF uptake, p<0.001	Hagos et al., 2007
SLC22A11	ESTRONE SULFATE	in vitro, HEK293	Km: 1.1±0.2 uM	Hagos et al., 2007
SLC22A11	FUMARATE	in vitro, HEK293	inhibits 6CF uptake, p<0.05	Hagos et al., 2007
SLC22A11	PYRIDOXIC ACID	in vitro, HEK293	confirmed uptake, p<0.01	Shen et al., 2018
SLC22A11	SUCCINATE	in vitro, HEK293	inhibits 6CF uptake, p<0.05	Hagos et al., 2007
SLC22A11	URIC ACID	in vitro, HEK293	Km: 106.0±45.9 uM	Hagos et al., 2007
SLC22A11	PROSTAGLANDIN E2	in vitro, proximal tubule cells S2	Km: 154±12.1 nM	Kimura et al., 2002
SLC22A11	PROSTAGLANDIN F2	in vitro, proximal tubule cells S2	Km: 154±12.1 nM	Kimura et al., 2002
SLC22A12	UREA	GWAS, rs504915	p=3.00E-63	Okada et al., 2012
SLC22A12	LACTATE	in vitro, Xenopus oocytes	trans-stimulates urate transport, p<0.05	Enomoto et al., 2002
SLC22A12	NICOTINATE	in vitro, Xenopus oocytes	trans-stimulates urate transport, p<0.05	Enomoto et al., 2002
SLC22A12	SALICYLATE	in vitro, Xenopus oocytes	21.9±3.4% urate uptake	Enomoto et al., 2002
SLC22A12	OROTATE	in vitro, Xenopus oocytes	26.5±4.9% urate uptake	Enomoto et al., 2002
SLC22A12	SUCCINATE	in vitro, Xenopus oocytes	23.7±5.2% urate uptake (10mM)	Enomoto et al., 2002
SLC22A12	URIC ACID	in vitro, Xenopus oocytes	Km: 371±28 uM	Enomoto et al., 2002
SLC22A22	12-HYDROXYEICOSATETRAENOIC ACID	in vitro, proximal tubule cells S2	inhibited PGE2 uptake, p<0.001	Shiraya et al., 2010
SLC22A22	15-HYDROPEROXYEICOSATETRAENOIC ACID	in vitro, proximal tubule cells S2	inhibited PGE2 uptake, p<0.01	Shiraya et al., 2010
SLC22A22	15-HYDROXYEICOSATETRAENOIC ACID	in vitro, proximal tubule cells S2	inhibited PGE2 uptake, p<0.001	Shiraya et al., 2010
SLC22A22	DEHYDROEPIANDROSTERONE SULFATE	in vitro, proximal tubule cells S2	inhibited PGE2 uptake, p<0.01	Shiraya et al., 2010
SLC22A22	PROSTAGLANDIN B2	in vitro, proximal tubule cells S2	inhibited PGE2 uptake, p<0.001	Shiraya et al., 2010
SLC22A22	PROSTAGLANDIN D2	in vitro, proximal tubule cells S2	Km: 371.6 ± 58.1 nM	Shiraya et al., 2010
SLC22A22	PROSTAGLANDIN E1	in vitro, proximal tubule cells S2	Km: 156.8 ± 18.9 nM	Shiraya et al., 2010
SLC22A22	PROSTAGLANDIN E2	in vitro, proximal tubule cells S2	Km: 118.3 ± 3.0 nM	Shiraya et al., 2010
SLC22A22	PROSTAGLANDIN F2	in vitro, proximal tubule cells S2	Km: 158.2 ± 18.7 nM	Shiraya et al., 2010
SLC22A22	PROSTAGLANDIN G2	in vitro, proximal tubule cells S2	inhibited PGE2 uptake, p<0.001	Shiraya et al., 2010
SLC22A22	PROSTAGLANDIN H2	in vitro, proximal tubule cells S2	inhibited PGE2 uptake, p<0.001	Shiraya et al., 2010
SLC22A22	SUCCINATE	in vitro, proximal tubule cells S2	inhibited PGE2 uptake, p<0.01	Shiraya et al., 2010

## Sheet: OATS4
GENE	METABOLITE	Source (GWAS, in vitro, in vivo)	Metrics	Citation
SLC22A9	BUTYRATE	in vitro, Xenopus oocytes	trans-stimulates transport p<0.001	Shin et al., 2007
SLC22A9	DEHYDROEPIANDROSTERONE SULFATE	in vitro, Xenopus oocytes	Km: 2.2 uM	Shin et al., 2007
SLC22A9	ESTRONE SULFATE	in vitro, Xenopus oocytes	Km: 8.7 uM	Shin et al., 2007
SLC22A9	ETIOCHOLANOLONE GLUCURONIDE	GWAS, rs113747568	p=5.27E-28	Long et al., 2017
SLC22A9	NICOTINATE	in vitro, Xenopus oocytes	trans-stimulates transport p<0.01	Shin et al., 2007
SLC22A9	PROGESTERONE	GWAS, rs112295236	p=8.00E-12	Ruth et al., 2015
SLC22A9	PROPIONATE	in vitro, Xenopus oocytes	trans-stimulates transport p<0.01	Shin et al., 2007
SLC22A9	TYRAMINE O-SULFATE	GWAS, rs397740636	P=2.06E-06	Long et al., 2017
SLC22A9	VALERATE	in vitro, Xenopus oocytes	trans-stimulates transport p<0.001	Shin et al., 2007
SLC22A10	EPIANDROSTERONE SULFATE	GWAS, rs1939769	p=2.06E-07	Shin et al., 2014
SLC22A10	ETIOCHOLANOLONE GLUCURONIDE	GWAS, rs112753913	p=1.88E-27	Long et al., 2017
SLC22A24	ANDROSTANEDIOL GLUCURONIDE	in vitro, HEK293 Flp-In	IC50: 21±11 uM	Yee et al., 2019
SLC22A24	CHENODEOXYCHOLATE	in vitro, HEK293 Flp-In	IC50: 2.6±1.0 uM	Yee et al., 2019
SLC22A24	ESTRADIOL GLUCURONIDE	in vitro, HEK293 Flp-In	3-5 fold over vector control	Yee et al., 2019
SLC22A24	ESTRONE SULFATE	in vitro, HEK293 Flp-In	5-10 fold over vector control	Yee et al., 2019
SLC22A24	ETIOCHOLANOLONE GLUCURONIDE	in vitro, HEK293 Flp-In	IC50: 29±4.7 uM	Yee et al., 2019
SLC22A24	ETIOCHOLANOLONE GLUCURONIDE	GWAS, rs113532193	p=5.90E-37	Long et al., 2017
SLC22A24	PREGNANEDIOL-3-GLUCURONIDE	in vitro, HEK293 Flp-In	IC50: >200uM	Yee et al., 2019
SLC22A24	PREGNANEDIOL-3-GLUCURONIDE	GWAS, rs202187460	p=5.91E-07	Long et al., 2017
SLC22A24	PREGNENOLONE SULFATE	in vitro, HEK293 Flp-In	IC50: 1.4±0.1 uM	Yee et al., 2019
SLC22A24	PROGESTERONE	in vitro, HEK293 Flp-In	IC50: 7.4±3.0 uM	Yee et al., 2019
SLC22A24	TAUROCHOLIC ACID	in vitro, HEK293 Flp-In	10-20 fold over vector control	Yee et al., 2019
SLC22A24	URSODEOXYCHOLATE	in vitro, HEK293 Flp-In	IC50: 7.6±1.2 uM	Yee et al., 2019
SLC22A25	ETIOCHOLANOLONE GLUCURONIDE	GWAS, rs113950742	p=4.12E-27	Long et al., 2017

## Sheet: OAT-like
GENE	METABOLITE	Source (GWAS, in vitro, in vivo)	Metrics	Citation
SLC22A13	AMINOHIPPURIC ACID	in vitro, Xenopus oocytes	uptake: 137.4±8.8 fmol/oocyte/30min	Bahn et al., 2008
SLC22A13	ESTRONE SULFATE	in vitro, Xenopus oocytes	inhibited PAH transport, p<0.001	Bahn et al., 2008
SLC22A13	LACTATE	in vitro, Xenopus oocytes	trans-stimulates transport, p<0.001	Bahn et al., 2008
SLC22A13	NICOTINATE	in vitro, Xenopus oocytes	Km: 22 uM	Bahn et al., 2008
SLC22A13	SALICYLATE	in vitro, Xenopus oocytes	inhibited PAH transport, p<0.05	Bahn et al., 2008
SLC22A13	SUCCINATE	in vitro, Xenopus oocytes	trans-stimulates transport, p<0.01	Bahn et al., 2008
SLC22A13	URIC ACID	in vitro, Xenopus oocytes	IC50: 759±501 uM; uptake: 3.2±0.2 fmol/oocyte/30min	Bahn et al., 2008

## Sheet: OAT-related
GENE	METABOLITE	Source (GWAS, in vitro, in vivo)	Metrics	Citation
SLC22A18	CAPRATE(10:0)	GWAS, rs384037	p=8.54E-05	Shin et al., 2014
SLC22A18	SERINE	GWAS, rs450208	p=2.75E-05	Shin et al., 2014
SLC22A23	BILIRUBIN	GWAS, rs11759126	p=2.30E-05	Shin et al., 2014
SLC22A23	3-METHYLHISTIDINE	GWAS, rs142766726	p=4.78E-06	Long et al., 2017
SLC22A23	BENZOATE	GWAS, rs1475475	p=3.53E-05	Shin et al., 2014
SLC22A23	5ALPHA-ANDROSTAN-3BETA,17BETA-DIOLDI SULFATE	GWAS, rs4959232	p=1.70E-05	Shin et al., 2014
SLC22A23	2-PALMITOYL-GPC(16:0)	GWAS, rs7746773	p=6.26E-06	Long et al., 2017
SLC22A23	OLEOYLETHANOLAMIDE	GWAS, rs7756837	p=8.08E-06	Shin et al., 2014
SLC22A23	1-LINOLEOYL-GPI(18:2)	GWAS, rs7770437	p=9.95E-06	Long et al., 2017
SLC22A23	2-HYDROXYPALMITATE	GWAS, rs7770437	p=9.68E-07	Long et al., 2017
SLC22A23	2-HYDROXYSTEARATE	GWAS, rs7770437	p=9.87E-06	Long et al., 2017
SLC22A23	2-OLEOYL-GPC(18:1)	GWAS, rs7770437	p=5.09E-07	Long et al., 2017
SLC22A23	PROPIONYLCARNITINE	GWAS, rs9503551	p=3.75E-06	Shin et al., 2014
SLC22A23	UNDECANOATE(11:0)	GWAS, rs979306	p=9.95E-05	Shin et al., 2014

## Sheet: OCT
GENE	METABOLITE	Source (GWAS, in vitro, in vivo)	Metrics	Citation
SLC22A1	ACETYLCARNITINE	GWAS, rs1564348	p=2.237E-6	Shin et al., 2014
SLC22A1	BETAINE	GWAS, rs662138	p=1.342E-5	Shin et al., 2014
SLC22A1	BUTYRYLCARNITINE	GWAS, rs1564348	p=5.944E-6	Shin et al., 2014
SLC22A1	N-[3-(2-Oxopyrrolidin-1-yl)propyl]acetamide	GWAS, rs1382785	p=4.01E-6	Shin et al., 2014
SLC22A1	2-METHYLBUTYROYLCARNITINE	GWAS, rs1564348	p=2.868E-6	Shin et al., 2014
SLC22A1	ISOBUTYRYLCARNITINE	GWAS, rs1564348	p=1.37E-12	Shin et al., 2014
SLC22A1	PYRIDOXIC ACID	GWAS, rs2197296	p=2.37E-05	Shin et al., 2014
SLC22A1	CARNITINE	GWAS, rs622342	p=9.17E-09	Shin et al., 2014
SLC22A1	CARNITINE	in vivo, liver-specific KO mice urinalysis	p<0.001	Kim et al., 2017
SLC22A1	CARNITINE	in vitro, HEK293 mOCT1	p<0.01	Kim et al., 2017
SLC22A1	GLUTAROYL CARNITINE	GWAS, rs3798167	p=7.314E-7	Shin et al., 2014
SLC22A1	HEXANOYLCARNITINE	GWAS, rs1564348	p=7.155E-7	Shin et al., 2014
SLC22A1	OCTANOYLCARNITINE	GWAS, rs662138	p=1.512E-14	Draisma et al., 2015
SLC22A1	MPP+	in vitro, HEK293	multiple assays	Grundemann et al., 1995
SLC22A1	EPINEPHRINE	in vitro, HEK293	Km: 1.10±0.30 mM	Amphoux et al., 2006
SLC22A1	SEROTONIN	in vitro, HEK293	p<0.05	Chen et al., 2014
SLC22A1	SEROTONIN	GWAS, rs683369	p=6.671E-5	Shin et al., 2014
SLC22A1	TAUROLITHOCHOLATE 3-SULFATE	GWAS, rs3822841	p=9.644E-5	Shin et al., 2014
SLC22A1	TETRAETHYLAMMONIUM	in vitro, HEK293	multiple assays	Grundemann et al., 1995
SLC22A1	THIAMINE	in vitro, HEK293; in vivo, Oct-/-mice	multiple assays	Chen et al., 2014
SLC22A1	PROPIONYLCARNITINE	GWAS, rs1564348	p=1.175E-10	Shin et al., 2014
SLC22A1	PROSTAGLANDIN E2	in vitro, proximal tubule cells S2	Km: 657±53.1 nM	Kimura et al., 2002
SLC22A1	PROSTAGLANDIN F2	in vitro, proximal tubule cells S2	Km: 477±33.1 nM	Kimura et al., 2002
SLC22A1	PYROXIDATE	GWAS, rs2197296	p=4.47E-6	Shin et al., 2014
SLC22A1	CHOLINE	in vitro, rOCT1 Xenopus oocytes	Km: 346±50 uM	Sweet et al., 2001
SLC22A1	DOPAMINE	in vitro, rOCT1 Xenopus oocytes	Km: 19.4±2.9 uM	Busch et al., 1996
SLC22A1	NOREPINEPHRINE	in vitro, Xenopus oocytes	Ki: 6.2 mM	Busch et al., 1996
SLC22A1	QUININE	in vitro, Xenopus oocytes	Ki: 0.93±0.08 uM	Gorboulev et al., 1997
SLC22A2	N1-METHYLADENOSINE	GWAS, rs316003	p=1.97E-08	Shin et al., 2014
SLC22A2	3-DEHYDROCARNITINE	GWAS, rs316019	p=2.06E-08	Shin et al., 2014
SLC22A2	SUCCINYLCARNITINE	GWAS, rs3798156	p=7.15E-05	Shin et al., 2014
SLC22A2	ISOBUTYRYLCARNITINE	GWAS, rs13194446	p=1.267E-12	Shin et al., 2014
SLC22A2	TRYPTOPHAN	in vitro, defolliculated oocytes	IC50: 6.11 mM	Song et al., 2012
SLC22A2	URIDINE	in vitro, defolliculated oocytes	IC50: 51.5 mM	Song et al., 2012
SLC22A2	CREATININE	in vitro, HEK293	Km: 4.0 mM	Urakami et al., 2004
SLC22A2	DOPAMINE	in vitro, HEK293	Km: 1.40±0.20 mM	Amphoux et al., 2006
SLC22A2	EPINEPHRINE	in vitro, HEK293	Km: 0.42±0.10 mM	Amphoux et al., 2006
SLC22A2	HISTAMINE	in vitro, HEK293	Km: 0.94±0.15 mM	Amphoux et al., 2006
SLC22A2	MPP+	in vitro, HEK293	multiple assays	Grundemann et al., 1999
SLC22A2	NOREPINEPHRINE	in vitro, HEK293	Km: 1.50±0.10 mM	Amphoux et al., 2006
SLC22A2	SEROTONIN	in vitro, HEK293	Km: 0.29±0.06 mM	Amphoux et al., 2006
SLC22A2	TETRAETHYLAMMONIUM	in vitro, HEK293	multiple assays	Grundemann et al., 1995
SLC22A2	THIAMINE	in vitro, hepatocyes; in vivo, breast milk of Oct2-/- mice	28-fold thiamine decrease, p<0.05	Kato et al., 2015
SLC22A2	PROSTAGLANDIN E2	in vitro, proximal tubule cells S2	Km: 28.9±3.2 nM	Kimura et al., 2002
SLC22A2	PROSTAGLANDIN F2	in vitro, proximal tubule cells S2	Km: 334±24.1 nM	Kimura et al., 2002
SLC22A2	CHOLINE	in vitro, Xenopus oocytes	km: 102±80 uM	Sweet et al., 2001
SLC22A2	QUININE	in vitro, Xenopus oocytes	Ki: 3.4±0.8 uM	Gorboulev et al., 1997
SLC22A2	2-HYDROXY VALERIC ACID	in vivo, urinalysis of various genotypes	p=0.0005	Song et al., 2012
SLC22A2	3-HYDROXY-3-METHYLGLUTARIC ACID	in vivo, urinalysis of various genotypes	p=0.0005	Song et al., 2012
SLC22A2	OXOPROLINE	in vivo, urinalysis of various genotypes	p=0.0005	Song et al., 2012
SLC22A2	CITRULLINE	in vivo, urinalysis of various genotypes	p=0.0005	Song et al., 2012
SLC22A2	XANTHINE	in vivo, urinalysis of various genotypes	p=0.0005	Song et al., 2012
SLC22A2	STACHYDRINE	GWAS, rs316013	p=4.11E-5	Shin et al., 2014
SLC22A2	XANTHOSINE	in vivo, urinalysis of various genotypes	p=0.0005	Song et al., 2012
SLC22A2	TRYPTOPHAN	in vivo, urinalysis of various genotypes	p=0.0005	Song et al., 2012
SLC22A2	PHENYLALANYLPHENYLALANINE	GWAS, rs492315	p=7.574E-5	Shin et al., 2014
SLC22A2	MALATE	GWAS, rs492315	p=8.206E-5	Shin et al., 2014
SLC22A3	CREATININE	GWAS, rs1397168	p=7.21E-05	Shin et al., 2014
SLC22A3	SUCCINYLCARNITINE	GWAS, rs3106166	p=2.58E-05	Shin et al., 2014
SLC22A3	7-METHYLGUANINE	GWAS, rs377551	p=4.97E-05	Shin et al., 2014
SLC22A3	EPINEPHRINE	in vitro, HEK293	Km: 0.24±0.05 mM	Amphoux et al., 2006
SLC22A3	HISTAMINE	in vitro, HEK293	Km: 0.22±0.06 mM	Amphoux et al., 2006
SLC22A3	NOREPINEPHRINE	in vitro, HEK293	Km: 2.63±0.08 mM	Amphoux et al., 2006
SLC22A3	DOPAMINE	in vitro, HRPE cells	inhibitory	Wu et al., 1998
SLC22A3	CHOLINE	in vitro, HRPE cells	45% of control	Wu et al., 1998
SLC22A3	MPP+	in vitro, HRPE cells	IC50 138 ± 11 μM	Wu et al., 1998
SLC22A3	TETRAETHYLAMMONIUM	in vitro, HRPE cells	23% of control	Wu et al., 1998
SLC22A3	SEROTONIN	in vitro, HRPE cells	inhibitory	Wu et al., 1998
SLC22A3	CARNITINE	in vitro, Koepsell et al., unpublished data	IC50: 5,590 uM	Koepsell et al., 2007
SLC22A3	CARNITINE	GWAS, rs2457571	p=4.485E-6	Shin et al., 2014

## Sheet: OCTN OCTN-related
GENE	METABOLITE	Source (GWAS, in vitro, in vivo)	Metrics	Citation
SLC22A4	2-METHYLBUTYROYLCARNITINE	GWAS, rs272884	p=1.01E-06	Shin et al., 2014
SLC22A4	2-TETRADECENOYLCARNITINE	GWAS, rs272884	p=3.48E-09	Shin et al., 2014
SLC22A4	3-DEHYDROCARNITINE	GWAS, rs272884	p=2.25E-25	Shin et al., 2014
SLC22A4	ACETYLCARNITINE	GWAS, rs272884	p=3.59E-11	Shin et al., 2014
SLC22A4	BUTYRYLCARNITINE	GWAS, rs272884	p=3.83E-08	Shin et al., 2014
SLC22A4	CARNITINE	GWAS, rs272884	p=6.57E-15	Shin et al., 2014
SLC22A4	CIS-4-DECENOYLCARNITINE	GWAS, rs272884	p=4.61E-05	Shin et al., 2014
SLC22A4	DECANOYLCARNITINE	GWAS, rs272884	p=2.91E-05	Shin et al., 2014
SLC22A4	GLUTAROYLCARNITINE	GWAS, rs272884	p=1.36E-05	Shin et al., 2014
SLC22A4	HEXANOYLCARNITINE	GWAS, rs272884	p=2.30E-10	Shin et al., 2014
SLC22A4	HOMOSTACHYDRINE	GWAS, rs272884	p=8.86E-10	Shin et al., 2014
SLC22A4	HYDROXYISOVALEROYLCARNITINE	GWAS, rs272884	p=5.27E-08	Shin et al., 2014
SLC22A4	ISOBUTYRYLCARNITINE	GWAS, rs272884	p=9.03E-05	Shin et al., 2014
SLC22A4	ISOVALERYLCARNITINE	GWAS, rs272884	p=1.11E-30	Shin et al., 2014
SLC22A4	LAURYLCARNITINE	GWAS, rs272884	p=1.13E-05	Shin et al., 2014
SLC22A4	OCTANOYLCARNITINE	GWAS, rs272884	p=1.88E-05	Shin et al., 2014
SLC22A4	OLEOYLCARNITINE	GWAS, rs272884	p=1.35E-10	Shin et al., 2014
SLC22A4	PALMITOYLCARNITINE	GWAS, rs272884	p=1.65E-09	Shin et al., 2014
SLC22A4	PROPIONYLCARNITINE	GWAS, rs272884	p=2.44E-11	Shin et al., 2014
SLC22A4	STEAROYLCARNITINE	GWAS, rs272884	p=1.11E-10	Shin et al., 2014
SLC22A4	ACYLCARNITINE	GWAS, rs273914	p=9.25E-23	Draisma et al., 2015
SLC22A4	ESTRONE SULFATE	GWAS, rs3792884	p=3.62E-05	Shin et al., 2014
SLC22A4	TRYPTOPHAN BETAINE	GWAS, rs3792884	p=4.85E-11	Shin et al., 2014
SLC22A4	CARNITINE	in vitro, HEK293	significant uptake, p<0.05	Yabuuchi et al., 1999
SLC22A4	TETRAETHYLAMMONIUM	in vitro, HEK293	Km: 0.436±0.041 mM	Tamai et al., 1997
SLC22A4	ERGOTHIONEINE	in vitro, HEK293	transport efficiency: 195 ul/min/mg of protein	Grundemann et al., 2005
SLC22A5	HOMOSTACHYDRINE	GWAS, rs17622208	p=8.01E-10	Shin et al., 2014
SLC22A5	ISOVALERYLCARNITINE	GWAS, rs17622208	p=5.11E-40	Shin et al., 2014
SLC22A5	PROPIONYLCARNITINE	GWAS, rs17622208	p=8.13E-14	Shin et al., 2014
SLC22A5	2-METHYLBUTYROYLCARNITINE	GWAS, rs274557	p=3.42E-06	Shin et al., 2014
SLC22A5	2-TETRADECENOYLCARNITINE	GWAS, rs274557	p=2.32E-09	Shin et al., 2014
SLC22A5	3-DEHYDROCARNITINE	GWAS, rs274557	p=6.83E-24	Shin et al., 2014
SLC22A5	ACETYLCARNITINE	GWAS, rs274557	p=1.44E-10	Shin et al., 2014
SLC22A5	BUTYRYLCARNITINE	GWAS, rs274557	p=5.28E-08	Shin et al., 2014
SLC22A5	CARNITINE	GWAS, rs274557	p=2.19E-14	Shin et al., 2014
SLC22A5	CIS-4-DECENOYLCARNITINE	GWAS, rs274557	p=9.95E-05	Shin et al., 2014
SLC22A5	DECANOYLCARNITINE	GWAS, rs274557	p=2.33E-05	Shin et al., 2014
SLC22A5	GLUTAROYLCARNITINE	GWAS, rs274557	p=9.15E-05	Shin et al., 2014
SLC22A5	HEXANOYLCARNITINE	GWAS, rs274557	p=1.37E-09	Shin et al., 2014
SLC22A5	HYDROXYISOVALEROYLCARNITINE	GWAS, rs274557	p=2.69E-07	Shin et al., 2014
SLC22A5	LAURYLCARNITINE	GWAS, rs274557	p=1.68E-06	Shin et al., 2014
SLC22A5	OCTANOYLCARNITINE	GWAS, rs274557	p=1.71E-05	Shin et al., 2014
SLC22A5	OLEOYLCARNITINE	GWAS, rs274557	p=2.53E-10	Shin et al., 2014
SLC22A5	PALMITOYLCARNITINE	GWAS, rs274557	p=7.63E-10	Shin et al., 2014
SLC22A5	STEAROYLCARNITINE	GWAS, rs274557	p=5.95E-10	Shin et al., 2014
SLC22A5	TRYPTOPHAN BETAINE	GWAS, rs274557	p=2.81E-05	Shin et al., 2014
SLC22A5	ACETYLCARNITINE	in vitro, HEK293	Km: 8.5 uM	Ohashi et al., 1999
SLC22A5	CARNITINE	in vitro, HEK293	Km: 4.3 uM	Ohashi et al., 1999
SLC22A15	ERGOTHIONEINE	GWAS, rs10802146	p=9.52E-05	Shin et al., 2014
SLC22A15	GLYCEROL-3-PHOSPHATE	GWAS, rs17515267	p=1.05E-05	Shin et al., 2014
SLC22A15	CITRULLINE	GWAS, rs2486079	p=4.08E-05	Shin et al., 2014
SLC22A15	1-PALMITOLEOYLGLYCEROL(16:1)	GWAS, rs35415357	p=5.27E-06	Long et al., 2017
SLC22A15	1-STEAROYL-2-MEADOYL-GPC(18:0/20:3N9)	GWAS, rs74111156	p=6.04E-06	Long et al., 2017
SLC22A15	1-PALMITOYL-2-MEADOYL-GPC(16:0/20:3N9)	GWAS, rs80155800	p=2.22E-06	Long et al., 2017
SLC22A15	PYRIDOXINE	Homology with (S. pompe) gene bsu1+	25% AA identity, 40% homology	Hediger et al., 2013
SLC22A16	BUTYRYLCARNITINE	GWAS, rs12195708	p=8.64E-09	Burkhardt et al., 2015
SLC22A16	2-HYDROXYISOVALERYLCARNITINE	GWAS, rs12210538	p=1.16E-10	Burkhardt et al., 2015
SLC22A16	ACETYLCARNITINE	GWAS, rs12210538	p=7.67E-29	Burkhardt et al., 2015
SLC22A16	ACYLCARNITINE	GWAS, rs12210538	p=5.03E-21	Draisma et al., 2015
SLC22A16	CARNITINE	GWAS, rs12210538	p=6.07E-25	Burkhardt et al., 2015
SLC22A16	CIS-11,14,17-EICOSATRIENOICACIDMETHYLESTER	GWAS, rs12210538	p=2.06E-08	Burkhardt et al., 2015
SLC22A16	CORTISOL	GWAS, rs12210538	p=9.19E-06	Shin et al., 2014
SLC22A16	DECANOYLCARNITINE	GWAS, rs12210538	p=3.27E-10	Burkhardt et al., 2015
SLC22A16	LINOELAIDIC ACID	GWAS, rs12210538	p=8.94E-20	Burkhardt et al., 2015
SLC22A16	MYRISTOYLCARNITINE	GWAS, rs12210538	p=2.20E-08	Burkhardt et al., 2015
SLC22A16	OCTANOYLCARNITINE	GWAS, rs12210538	p=3.15E-32	Burkhardt et al., 2015
SLC22A16	PALMITOYLCARNITINE	GWAS, rs12210538	p=7.34E-31	Burkhardt et al., 2015
SLC22A16	PROPIONYLCARNITINE	GWAS, rs12210538	p=2.95E-25	Burkhardt et al., 2015
SLC22A16	STEAROYLCARNITINE	GWAS, rs12210538	p=2.02E-19	Burkhardt et al., 2015
SLC22A16	GAMMA-GLUTAMYLPHENYLALANINE	GWAS, rs17579044	p=5.90E-05	Shin et al., 2014
SLC22A16	ERGOTHIONEINE	GWAS, rs761590	p=6.15E-07	Shin et al., 2014
